# Supplementary material for: Metal acetylacetonate complexes for high energy density non-aqueous redox flow batteries
Source: Royal Society of Chemistry journal article supplement (doi:10.1039/c4ta06622g), 2015-01-01
Supplement: c4ta06622g1.pdf [file c4ta06622g1.pdf]

## Electronic Supplementary Information

### Metal Acetylacetonate Complexes for High Energy Density Non-Aqueous Redox Flow Batteries

*James A. Suttill, Jonathan F. Kucharyson, Ismailia L. Escalante-Garcia, Pablo J. Cabrera, Bryant R. James, Robert F. Savinell, Melanie S. Sanford\*, and Levi T. Thompson\**

|                                        |     |
|----------------------------------------|-----|
| Ligand Synthesis.....                  | S1  |
| Complex Synthesis.....                 | S3  |
| NMR Spectra.....                       | S8  |
| Solubility Measurements.....           | S17 |
| X-Ray Structure Determination .....    | S18 |
| Powder X-ray Diffraction Patterns..... | S23 |
| Cyclic Voltammograms.....              | S27 |
| Randles-Sevcik and EIS Plot.....       | S42 |
| References.....                        | S43 |

### Ligand Synthesis

#### General Procedure:

On the benchtop, potassium carbonate (0.1 eq.), the desired acrylate (1 eq.) and acetylacetone (5 eq.) were combined in a 20 mL vial, sealed and heated to 70 °C overnight with stirring. The resulting bright orange suspension was filtered through a celite pad and the solid residue was washed with 2 × 5 mL portions of acetylacetone. The washings and filtrate were combined and dried *in vacuo* to give a bright orange liquid, which was purified by vacuum distillation. Any variations from this procedure are disclosed for each individual compound. The authors note that the <sup>13</sup>C NMR data for the ligands detailed herein show less carbon signals than would be expected from the ascribed structures. The authors have attributed this to signal overlap given the structural similarity of the tautomers.

#### Preparation and characterization of tetrahydrofurfuryl 4-acetyl-5-oxohexanoate:

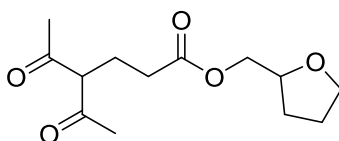

Tetrahydrofurfuryl 4-acetyl-5-oxohexanoate was prepared according to the general procedure employing tetrahydrofurfuryl acrylate (6.60 mL, 40.0 mmol), acetylacetone (20.5 mL, 200 mmol) and potassium carbonate (0.55 g, 3.98 mmol). The title compound was isolated as a yellow liquid via vacuum distillation (0.079 mm Hg, 152 °C) (9.26 g, 90 % yield, 36.1 mmol). IR ( $\nu$ ,  $\text{cm}^{-1}$ ): 2953 (w), 1728 (s), 1698 (s), 1421 (w), 1359 (m), 1246 (w), 1154 (s), 1080 (m), 1022 (m), 992 (m). <sup>1</sup>H NMR (400 MHz, CDCl<sub>3</sub>), mixture of tautomers:  $\delta$  16.72 (s, 0.16H), 4.05-4.15 (multiple peaks, 2H), 3.98 (m, 1H), 3.84 (m, 1H), 3.72-3.78 (multiple peaks, 1.7H), 2.57 (m, 0.4H), 2.41 (m, 0.4H), 2.32 (t,  $J$  = 4 Hz, 1.5H), 2.09-2.18 (multiple peaks, 6.46H), 1.97 (m, 1H), 1.88 (m, 2H), 1.56 (m, 1H). <sup>13</sup>C NMR (100.46 MHz, CDCl<sub>3</sub>):  $\delta$  203.8, 191.4, 172.6, 108.7, 76.5, 76.5, 68.5, 68.5, 67.0, 66.8, 66.7, 34.87, 31.6, 29.4, 29.3,

28.1, 28.0, 25.7, 23.0, 23.0, 22.9. HR-MS (ESI, positive ion mode)  $m/z$  calcd. for  $C_{13}H_{21}O_5$   $[M+H]^+$ : 257.1384, found: 257.1377.

#### Preparation and characterization of 2-methoxyethyl 4-acetyl-5-oxohexanoate:

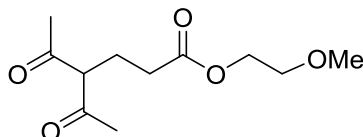

2-Methoxyethyl 4-acetyl-5-oxohexanoate was prepared according to the general procedure employing ethylene glycol methyl ether acrylate (2.57 mL, 20 mmol). The title compound was isolated as a yellow liquid via vacuum distillation (0.092 mm Hg, 119 °C) (2.66 g, 58 %, 11.5 mmol). IR ( $\nu$ ,  $cm^{-1}$ ): 2934 (w), 1728 (s), 1698 (s), 1420 (w), 1359 (m), 1248 (w), 1152 (m), 1127 (s), 1032 (m).  $^1H$  NMR (400 MHz,  $CDCl_3$ ), mixture of tautomers:  $\delta$  16.77 (s, 0.3H), 4.22-4.25 (multiple peaks, 2H), 3.75 (t,  $J$  = 6.8 Hz, 0.8H), 3.57-3.60 (multiple peaks, 2H), 3.38-3.39 (multiple peaks, 3H), 2.60 (m, 0.6H), 2.44 (m, 0.6H), 2.35 (t,  $J$  = 6.8 Hz, 1.6H), 2.12 – 2.20 (multiple peaks, 7.2H).  $^{13}C$  NMR (175.95 MHz,  $CDCl_3$ ), mixture of tautomers:  $\delta$  203.8, 191.4, 172.6, 108.7, 70.4, 70.4, 67.0, 63.7, 63.7, 59.0, 59.0, 34.7, 31.6, 29.4, 23.0, 22.9. HR-MS (ESI, positive ion mode)  $m/z$  calcd. for  $C_{11}H_{18}O_5Na$   $[M+Na]^+$ : 253.1046, found: 253.1044.

#### Preparation and characterization of 2-(2-methoxyethoxy)ethyl 4-acetyl-5-oxohexanoate:

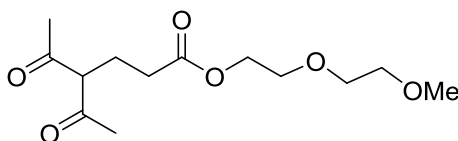

(2-(2-Methoxyethoxy)ethyl 4-acetyl-5-oxohexanoate was prepared according to the general procedure employing 2-(2-methoxyethoxy)ethyl acrylate (4.05 g, 23.2 mmol), 2,4-pentanedione (11.9 mL, 116 mmol) and potassium carbonate (0.32 g, 2.32 mmol). The title compound was isolated as a yellow liquid via vacuum distillation (0.092 mm Hg, 119 °C) (4.81 g, 76 % yield, 17.5 mmol). IR ( $\nu$ ,  $cm^{-1}$ ): 2880 (m), 1729 (s), 1698 (s), 1612 (w), 1421 (w), 1359 (m), 1248 (m), 1139 (m), 1107 (s), 958 (w).  $^1H$  NMR (400 MHz,  $CDCl_3$ ):  $\delta$  16.67 (s, 0.3H), 4.12-4.13 (multiple peaks, 2H), 3.66 (t,  $J$  = 7.2 Hz, 0.7H), 3.57-3.60 (multiple peaks, 2H), 3.51-3.54 (multiple peaks, 2H), 3.43-3.45 (multiple peaks, 2H), 3.26-3.27 (multiple peaks, 3H), 2.49 (m, 0.7H), 2.32 (m, 0.7H), 2.23 (t,  $J$  = 7.2 Hz, 1.4H), 2.00 – 2.10 (multiple peaks, 7H).  $^{13}C$  NMR (100.46 MHz,  $CDCl_3$ ):  $\delta$  203.9, 191.4, 172.6, 108.7, 72.0, 70.6, 70.6, 69.2, 69.1, 67.1, 63.8, 63.8, 59.1, 59.1, 34.8, 31.6, 29.4, 23.0, 22.9. HR-MS (ESI, positive ion mode)  $m/z$  calcd. for  $C_{14}H_{25}O_6$   $[M+H]^+$ : 289.1646, found: 289.1645.

### Preparation and characterization of ethyl 2-methyl-4-acetyl-5-oxohexanoate:

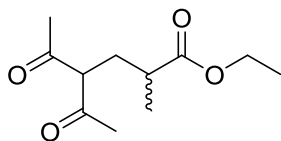

On the benchtop, potassium fluoride dihydrate (4.71 g, 50 mmol), 2,4-pentanedione (20.5 mL, 200 mmol) and ethyl methacrylate (12.4 mL, 100 mmol) were combined in 30 mL of ethanol and refluxed for three days. The bright orange suspension was filtered, concentrated *in vacuo* and refiltered to remove any insoluble species. The bright orange residue was first purified by vacuum distillation (0.050 mm Hg, 60 °C) to give a colourless liquid. This was further purified by silica gel column chromatography employing dichloromethane eluent. The title compound was isolated in 22% yield (4.71 g, 22 mmol) as a mixture contaminated with ethyl 2-methyl-5-oxohexanoate. The mixture was used without further purification. IR ( $\nu$ ,  $\text{cm}^{-1}$ ): 2978 (w), 1716 (s), 1462 (w), 1369 (m), 1251 (w), 1159 (s), 1026 (m). HR-MS (ESI, positive ion mode)  $m/z$  calcd. for  $\text{C}_{13}\text{H}_{21}\text{O}_5$   $[\text{M}+\text{Na}]^+$ : 237.1097, found: 237.1098.

### Complex Synthesis

**One-pot preparation of tris(1,3-diphenyl-1,3-propanedionato)chromium(III) (7), (2,4-pentanedionato)bis(1,3-diphenyl-1,3-propanedionato)chromium(III) (8) and bis(2,4-pentanedionato)(1,3-diphenyl-1,3-propanedionato)chromium(III) (9):**

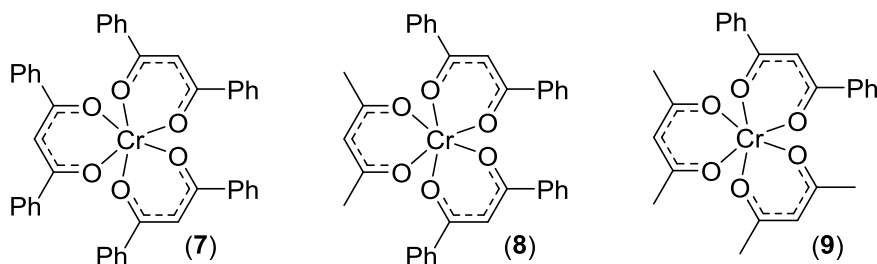

Chromium acetylacetonate (6.00 g, 17.2 mmol) and 1,3-diphenyl-1,3-propanedione (3.85 g, 17.2 mmol) were ground together in a mortar and pestle until a homogeneous, pink powder was obtained. The powder was transferred to a 250 mL Erlenmeyer flask and heated to 175 °C for four hours under a flow of nitrogen. Upon cooling, the title products were separated by silica gel column chromatography employing dichloromethane as the eluent. Tris(1,3-diphenyl-1,3-propanedionato)chromium(III) (7) was isolated as a dark brown solid (0.32 g, 3% yield, 0.45 mmol,  $R_f = 0.84$  in  $\text{CH}_2\text{Cl}_2$ ).  $\text{Mp} = 280\text{--}281$  °C (from  $\text{CH}_2\text{Cl}_2$ ); elemental analysis calcd. for  $\text{C}_{45}\text{H}_{33}\text{O}_6\text{Cr}$ : C 74.89, H 4.61; found: C 75.08, H 4.63; IR ( $\nu$ ,  $\text{cm}^{-1}$ ) 3062 (w), 1588 (m), 1515 (s), 1475 (s), 1452 (s), 1440 (m), 1365 (s), 1316 (s), 1226 (m), 1180 (w), 1067 (m), 1024 (m), 941 (w); HRMS (EI)  $m/z$  calcd. for  $\text{C}_{45}\text{H}_{33}\text{O}_6\text{Cr}$ : 721.1682; found = 721.1680. (2,4-Pentanedionato)bis(1,3-diphenyl-1,3-propanedionato)chromium(III) (8) was isolated as a dark brown solid (1.55 g, 15% yield, 2.60 mmol;  $R_f = 0.59$   $\text{CH}_2\text{Cl}_2$ ). Crystals suitable for X-ray diffraction were grown by vapour diffusion of hexanes into a chloroform solution of 8.  $\text{Mp} = 257\text{--}258$  °C (from hexanes/chloroform); elemental analysis calcd. for  $\text{C}_{35}\text{H}_{29}\text{O}_6\text{Cr}$ : C 70.34, H 4.89; found: C 70.23, H 4.90; IR ( $\nu$ ,  $\text{cm}^{-1}$ ) 1584 (w), 1517 (m), 1472 (w), 1450 (w), 1366 (m), 1316 (w), 1224 (w), 1066 (w), 1024 (w), 927 (w); HRMS (EI)  $m/z$  calcd. for  $\text{C}_{35}\text{H}_{29}\text{O}_6\text{Cr}$ : 597.1369; found: 597.1354. Bis(2,4-Pentanedionato)(1,3-diphenyl-1,3-propanedionato)chromium(III) (9)

(**9**) was isolated as a dark brown solid (2.72 g, 33% yield, 5.73 mmol,  $R_f = 0.19$  in  $\text{CH}_2\text{Cl}_2$ ). Crystals suitable for X-ray diffraction were grown by vapour diffusion of hexanes into a chloroform solution of the complex. Mp = 237-239 °C (from hexanes/chloroform); elemental analysis calcd. for  $\text{C}_{25}\text{H}_{25}\text{O}_6\text{Cr}$ : C 63.42, H 5.32; found: C 63.17, H 5.31; IR ( $\nu$ ,  $\text{cm}^{-1}$ ): 1572 (m), 1517 (s), 1476 (m), 1372 (s), 1314 (w), 1278 (m), 1230 (w), 1069 (m), 1023 (m), 931 (m); HRMS (EI)  $m/z$  calcd. for  $\text{C}_{25}\text{H}_{25}\text{O}_6\text{Cr}$ : 473.1056; found: 473.1048.

#### Preparation of **10**:

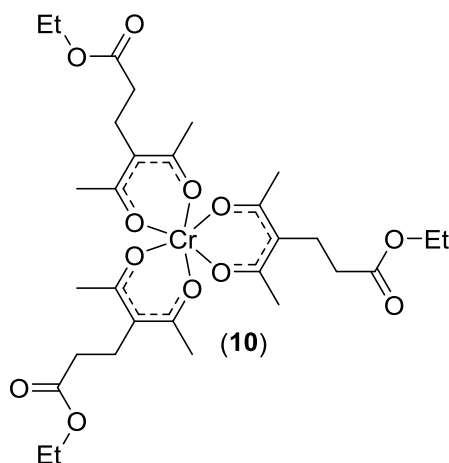

A solution of ethyl 4-acetyl-5-oxohexanoate (1.86 g, 9.30 mmol) in 25 mL of anhydrous tetrahydrofuran was slowly added to a suspension of sodium hydride (0.22 g, 9.30 mmol) in 25 mL of anhydrous tetrahydrofuran at 0 °C. The resulting yellow solution was allowed to warm to room temperature and stirred for three hours. Subsequently,  $\text{CrCl}_3(\text{thf})_3$  (1.12 g, 3.00 mmol) was added in a single portion, and the mixture was heated to 90 °C overnight. On the benchtop, the green/purple suspension was quenched with 1 mL of degassed water and dried under vacuum. The residue was purified via silica gel chromatography and then dried under vacuum overnight to afford **10** as a dark purple tar (1.45 g, 74% yield, 2.23 mmol,  $R_f = 0.31$  in 95%  $\text{CH}_2\text{Cl}_2$ /5% THF). Elemental analysis calcd. for  $\text{C}_{30}\text{H}_{45}\text{O}_{12}\text{Cr}$ : C 55.46, H 6.98; found: C 55.54, H 6.80; IR ( $\nu$ ,  $\text{cm}^{-1}$ ) 2980 (w), 1727 (s), 1563 (s), 1454 (s), 1358 (s), 1339 (s), 1291 (s), 1238 (w), 1154 (m), 1054 (w), 1020 (m), 985 (m); HRMS (ESI, positive ion mode)  $m/z$  calcd. for  $\text{C}_{30}\text{H}_{46}\text{O}_{12}\text{Cr}$   $[\text{M}+\text{H}]^+$  650.2389; found 650.2383.

#### Preparation of **11**:

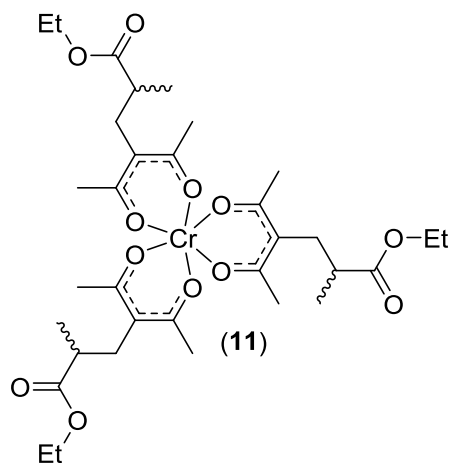

Complex **11** was prepared by an analogous procedure to complex **10** employing 2-methyl-4-acetyl-5-oxohexanoate (2.12 g, 9.90 mmol), sodium hydride (0.22 g, 9.30 mmol) and  $\text{CrCl}_3(\text{thf})_3$  (1.12 g, 3.00 mmol). Purification via silica gel column chromatography yielded **11** as a dark purple tar (0.84 g, 41% yield, 1.22 mmol,  $R_f = 0.30$  in 98%  $\text{CH}_2\text{Cl}_2/2\%$  THF). Elemental analysis calcd. for  $\text{C}_{33}\text{H}_{51}\text{O}_{12}\text{Cr}$ : C 57.30, H 7.43; found: C 57.57, H 7.32; IR ( $\nu$ ,  $\text{cm}^{-1}$ ) 2979 (w), 1726 (s), 1562 (s), 1450 (s), 1340 (s), 1289 (m), 1229 (w), 1172 (s), 1100 (m), 1051 (w), 1010 (s), 923 (m); HRMS (ESI, positive ion mode)  $m/z$  calcd. for  $\text{C}_{33}\text{H}_{52}\text{O}_{12}\text{Cr}$   $[\text{M}+\text{H}]^+$  692.2858, found 692.2851.

#### Preparation of 12:

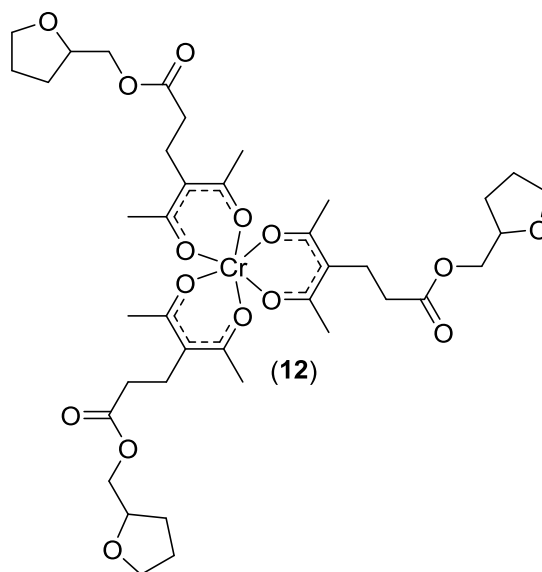

Complex **12** was prepared by an analogous procedure to **10** employing tetrahydrofurfuryl 4-acetyl-5-oxohexanoate (4.10 g, 16.0 mmol), sodium hydride (0.38 g, 16.0 mmol) and  $\text{CrCl}_3(\text{thf})_3$  (1.93 g, 5.16 mmol). Purification via silica gel column chromatography yielded **12** as a dark purple tar (3.00 g, 71% yield, 3.67 mmol,  $R_f = 0.56$  in 80%  $\text{CH}_2\text{Cl}_2/20\%$  THF). Elemental analysis calcd. for  $\text{C}_{39}\text{H}_{57}\text{O}_{15}\text{Cr}$ : C 57.27, H 7.02; found: C 57.33, H 6.69; IR ( $\nu$ ,  $\text{cm}^{-1}$ ) 2954 (w), 1729 (s), 1563 (s), 1455 (m), 1340 (s), 1292 (m), 1159 (m), 1082 (m), 985 (m); HRMS (ESI, positive ion mode)  $m/z$  calcd. for  $\text{C}_{39}\text{H}_{58}\text{O}_{15}\text{Cr}$   $[\text{M}+\text{H}]^+$  818.3175; found 818.3165.

### Preparation of 13:

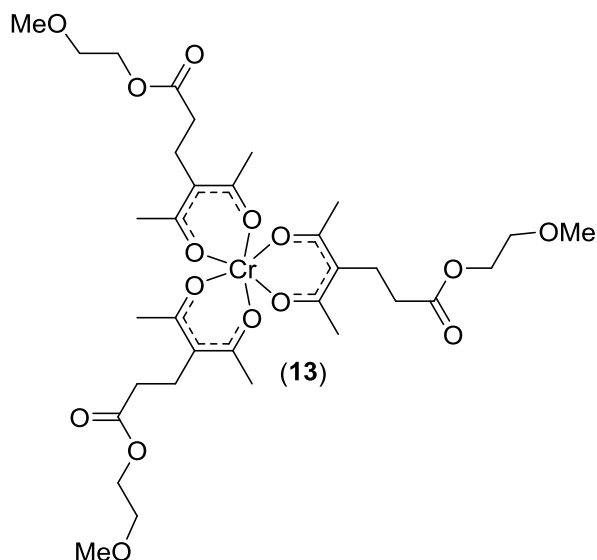

Complex **13** was prepared by an analogous procedure to **10** employing 2-methoxyethyl 4-acetyl-5-oxohexanoate (2.28 g, 9.90 mmol), sodium hydride (0.22 g, 9.30 mmol) and CrCl<sub>3</sub>(thf)<sub>3</sub> (1.12 g, 3.00 mmol). Purification via silica gel column chromatography yielded **13** as a dark purple tar (1.99 g, 90% yield, 2.69 mmol, R<sub>f</sub> = 0.60 in 80% CH<sub>2</sub>Cl<sub>2</sub>/20% THF. Elemental analysis calcd. for C<sub>33</sub>H<sub>51</sub>O<sub>15</sub>Cr: C 53.58, H 6.95; found: C 53.69, H 6.84; IR (ν, cm<sup>-1</sup>) 2925 (w), 1729 (s), 1564 (s), 1454 (s), 1340 (s), 1291 (m), 1160 (m), 1125 (m), 1056 (w), 1025 (w), 984 (m); ). HRMS (ESI, positive ion mode) *m/z* calcd. for C<sub>33</sub>H<sub>52</sub>O<sub>15</sub>Cr [M+H]<sup>+</sup> 740.2706; found 740.2703.

### Preparation of 14:

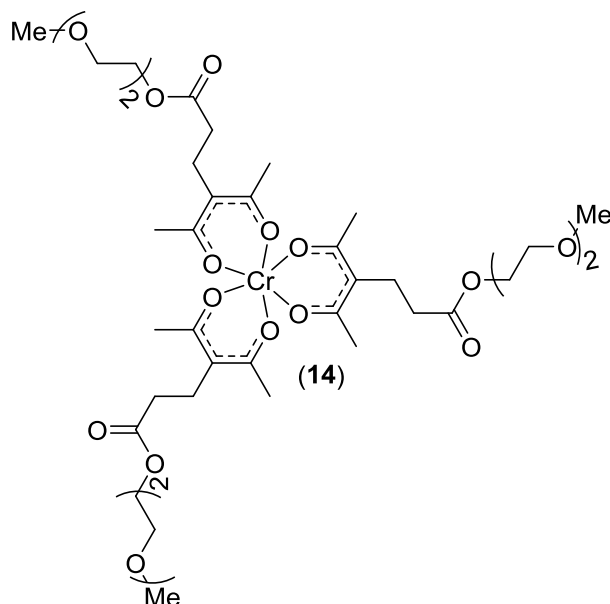

Complex **14** was prepared by an analogous procedure to **10** employing 2-(2-methoxyethoxy)ethyl 4-acetyl-5-oxohexanoate (2.26 g, 8.25 mmol), sodium hydride (0.19 g, 7.75 mmol) and CrCl<sub>3</sub>(thf)<sub>3</sub> (0.94 g, 2.50 mmol). Purification via silica gel column chromatography yielded **14** as a dark purple tar (1.30 g, 60% yield, 1.49 mmol, R<sub>f</sub> = 0.10 in

ethyl acetate). Elemental analysis calcd. for  $C_{39}H_{63}O_{18}Cr$ : C 53.72, H 7.29; found: C 53.77, H 7.16; IR ( $\nu$ ,  $cm^{-1}$ ) 2878 (m), 1729 (s), 1564 (s), 1341 (s), 1292 (m), 1106 (m), 1057 (w), 1020 (w), 985 (m); HRMS (ESI, positive ion mode)  $m/z$  calcd. for  $C_{39}H_{64}O_{18}Cr$   $[M+H]^+$  872.3492; found 872.3488.

### Preparation of **15**:

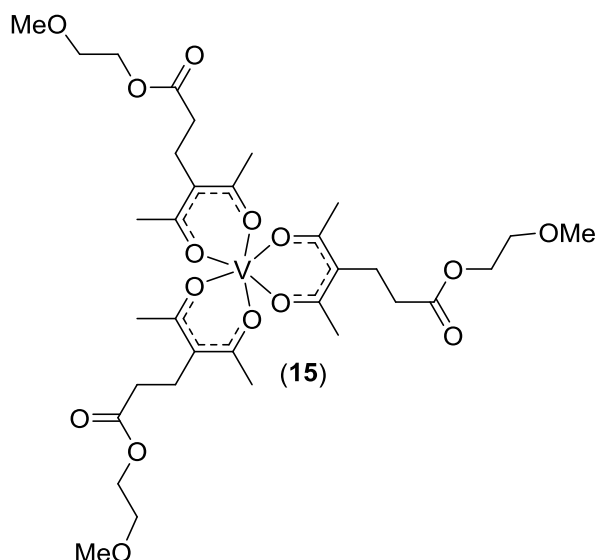

A solution of 2-methoxyethyl 4-acetyl-5-oxohexanoate (3.66 g, 15.9 mmol) in 50 mL of anhydrous tetrahydrofuran was slowly added via cannula to a suspension of sodium hydride (0.38 g, 16.0 mmol) in 100 mL of anhydrous tetrahydrofuran at 0 °C. The resulting solution was stirred for 15 min at 0 °C and then allowed to warm to room temperature where it was stirred for 3 h.  $VCl_3(thf)_3$  (2.00 g, 5.36 mmol) was added to the reaction mixture in a single portion. The resulting dark brown suspension was heated to 90 °C overnight. On the benchtop, the solvent was removed *in vacuo*. The dark brown residue was purified by passage through a 4-inch silica gel plug using 85%  $CH_2Cl_2$ /15% ethyl acetate as the eluent. The solvent was removed under vacuum, and the product was dried overnight at 80 °C to afford **15** as a dark brown tar (1.36 g, 35% yield, 1.88 mmol). The product was stored under an inert atmosphere to prevent oxidation. Elemental analysis calcd. for  $C_{33}H_{51}O_{15}V$ : C 53.67, H 6.96; found: C 53.61, H 6.91; IR ( $\nu$ ,  $cm^{-1}$ ) = 2890 (w), 2361 (w), 2337 (w), 1278 (s), 1699 (m), 1559 (s), 1456 (s), 1356 (m), 1286 (m), 1242 (w), 1157 (m), 1126 (m), 1030 (m), 983 (m); HRMS (ESI, positive ion mode)  $m/z$  calcd. for  $C_{33}H_{51}O_{15}V$   $[M]^+$  738.2662; found 738.2659.

## NMR Spectra

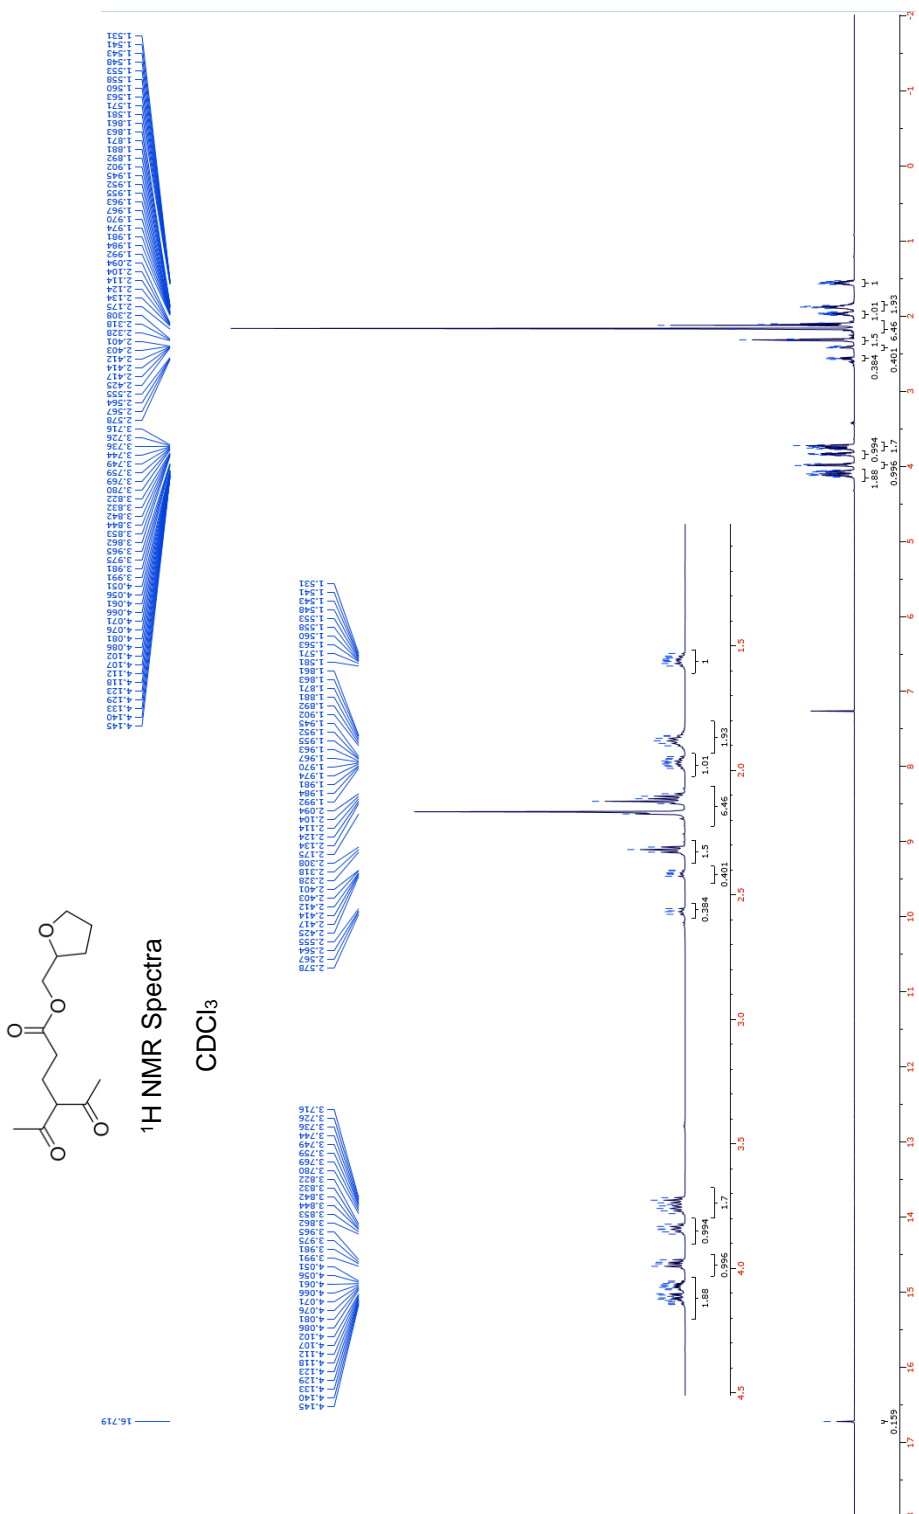



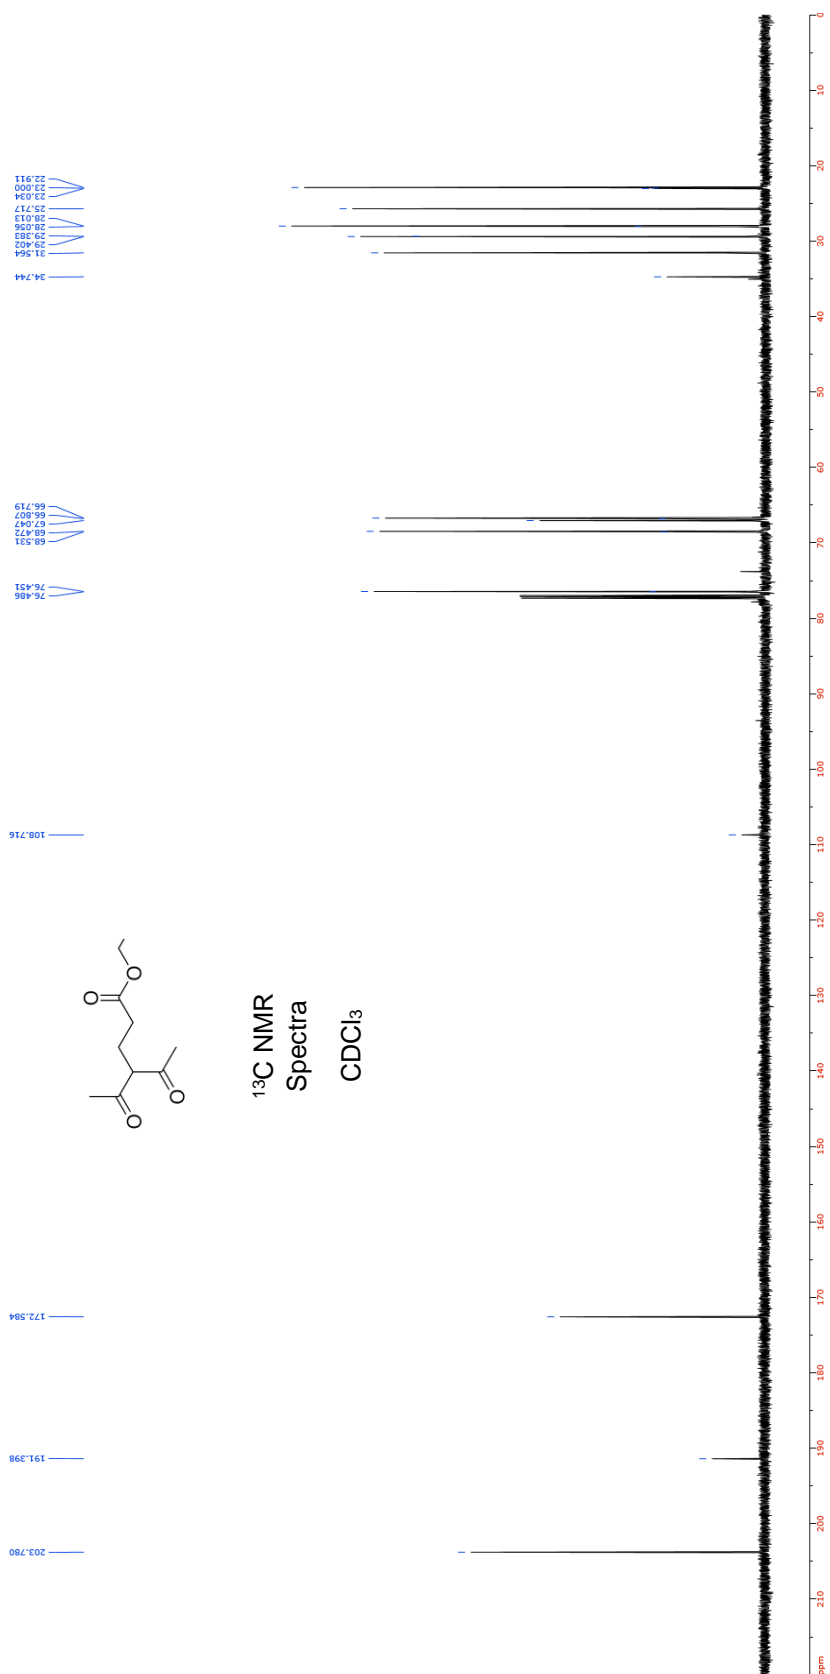

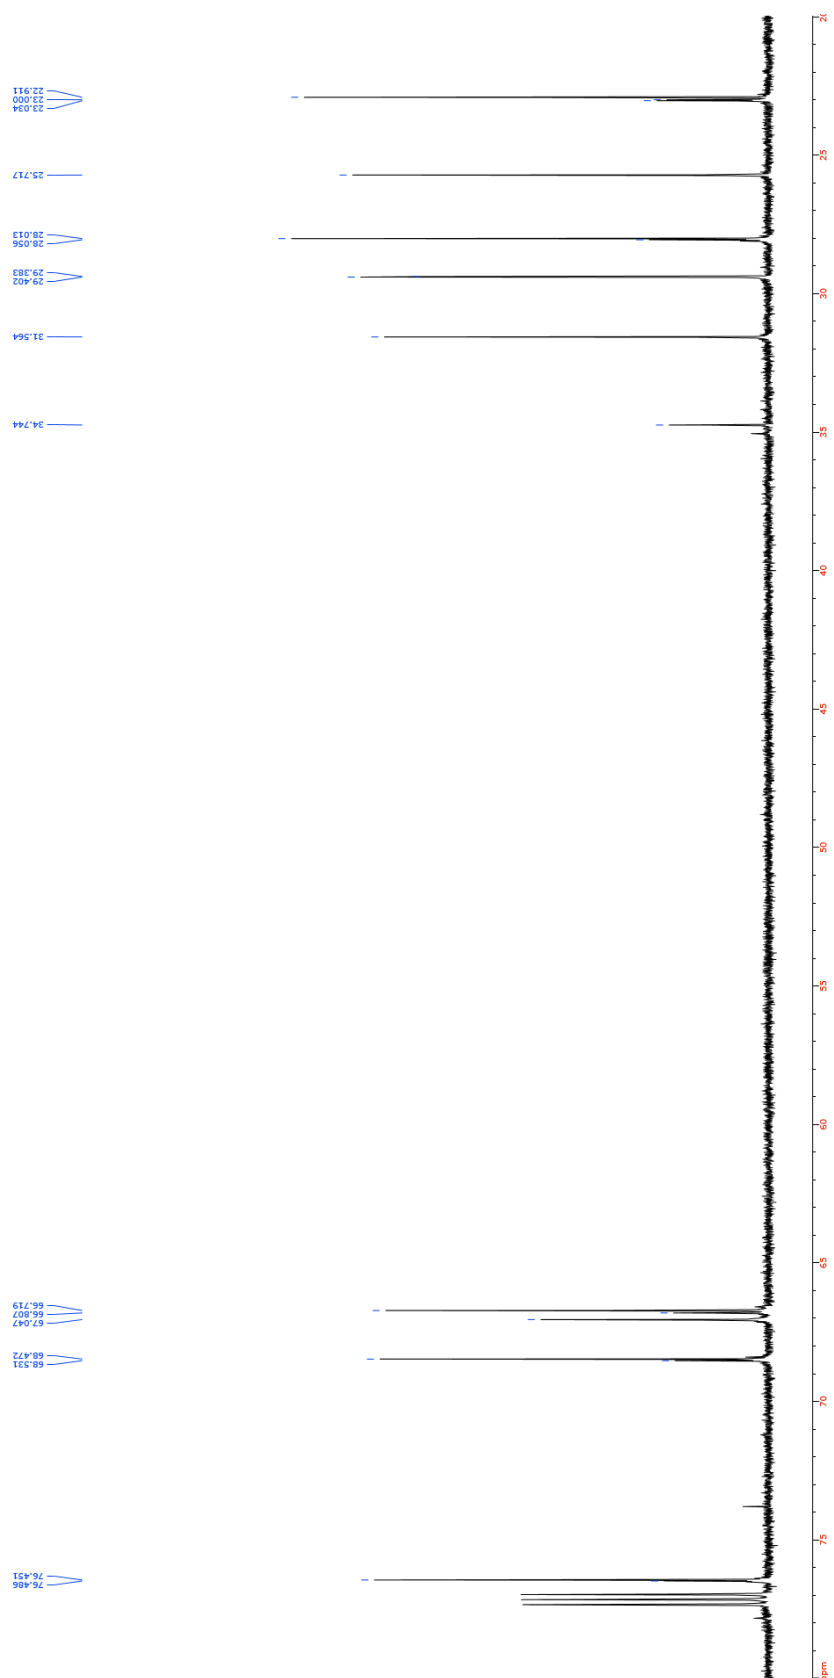

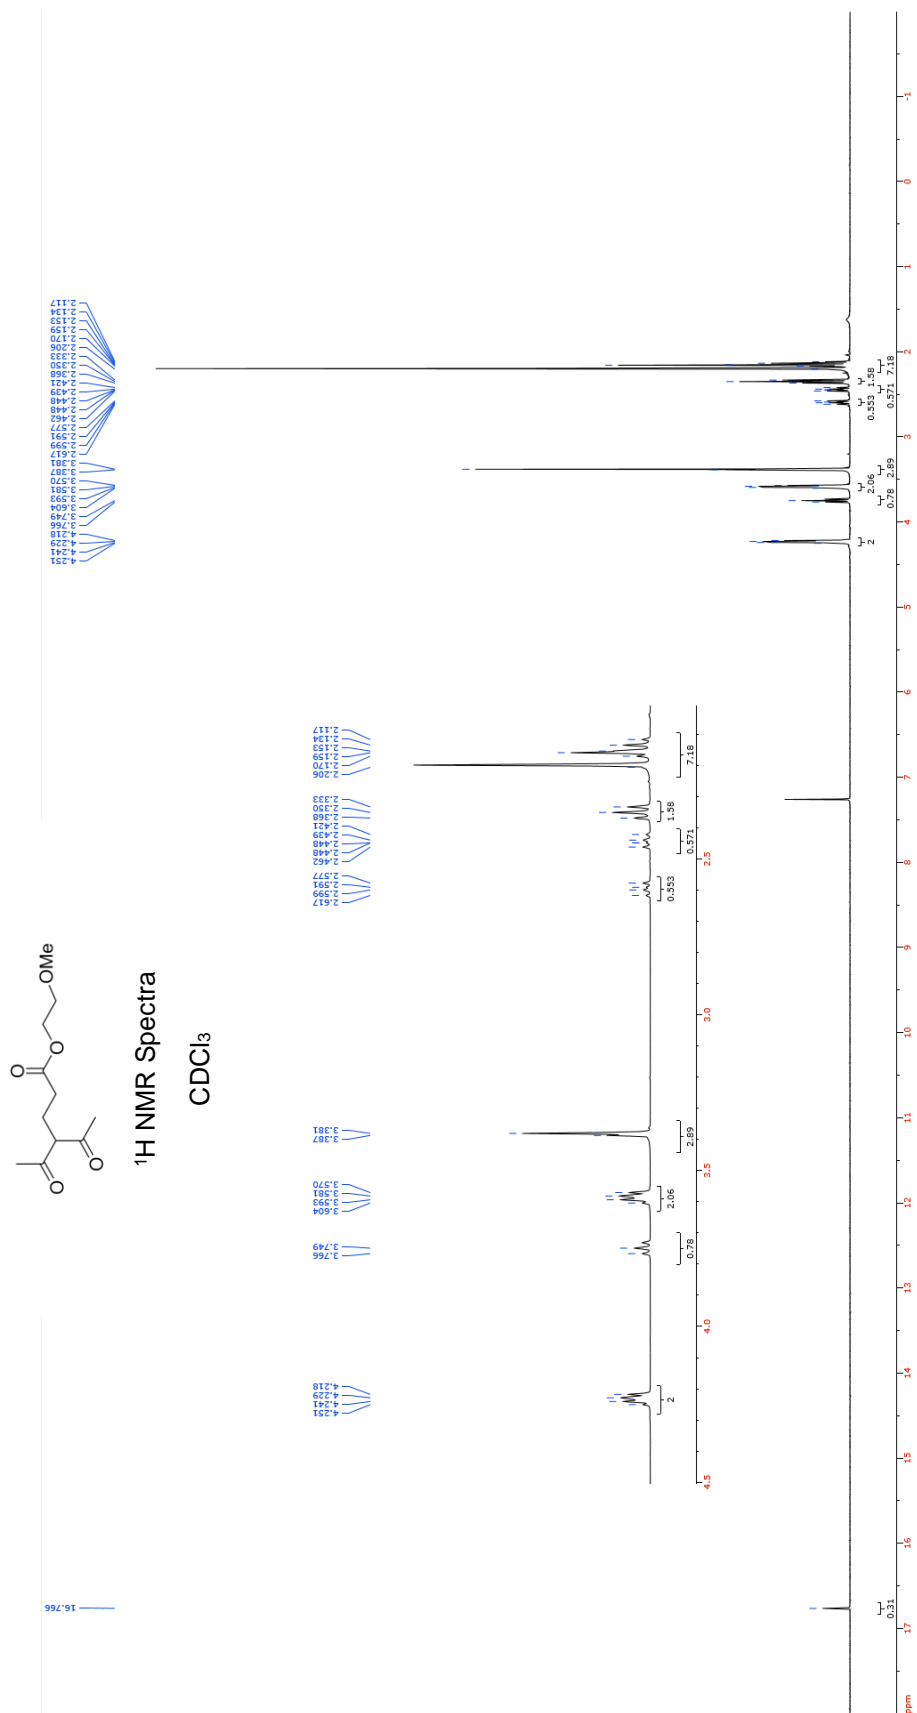

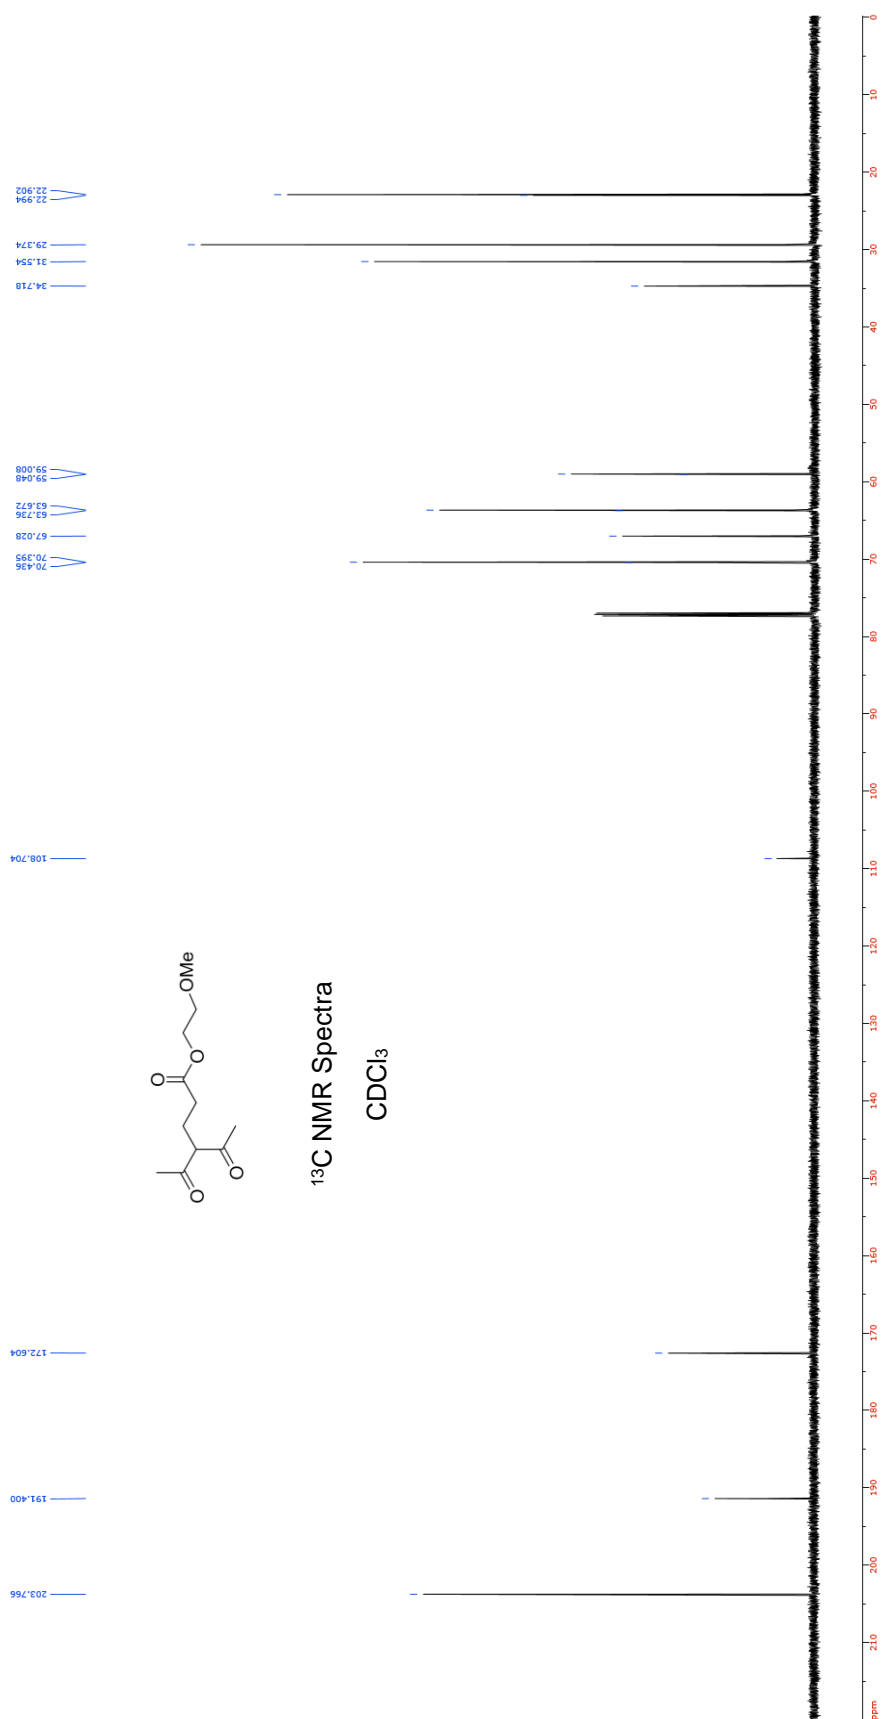

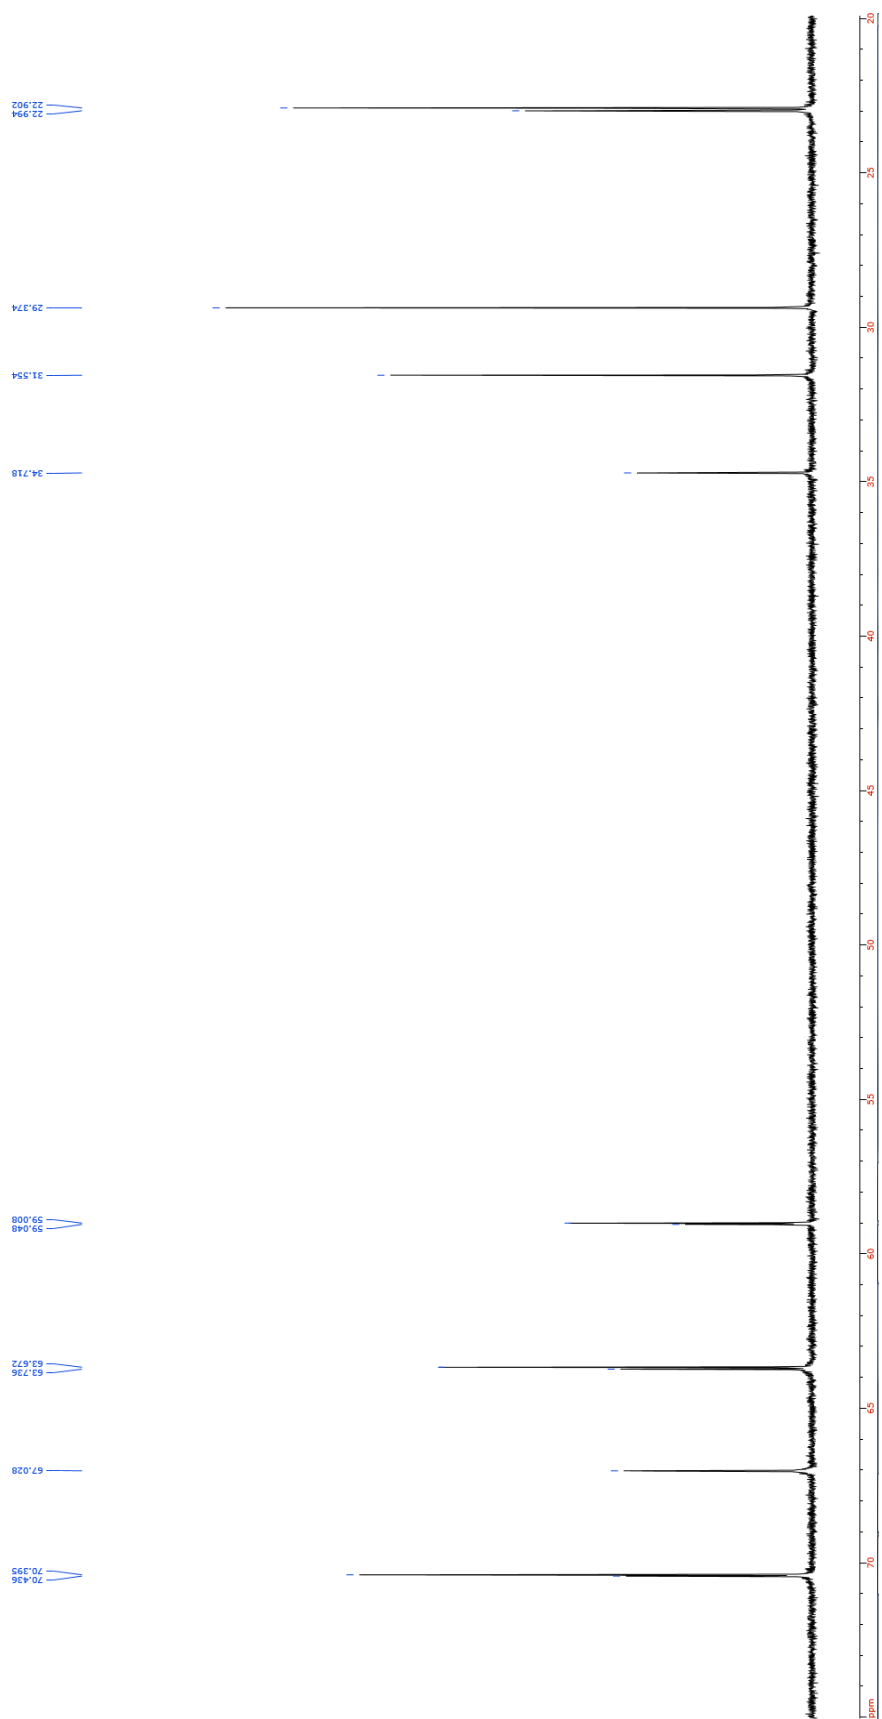

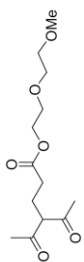<sup>1</sup>H NMR Spectra

CDCI<sub>3</sub>

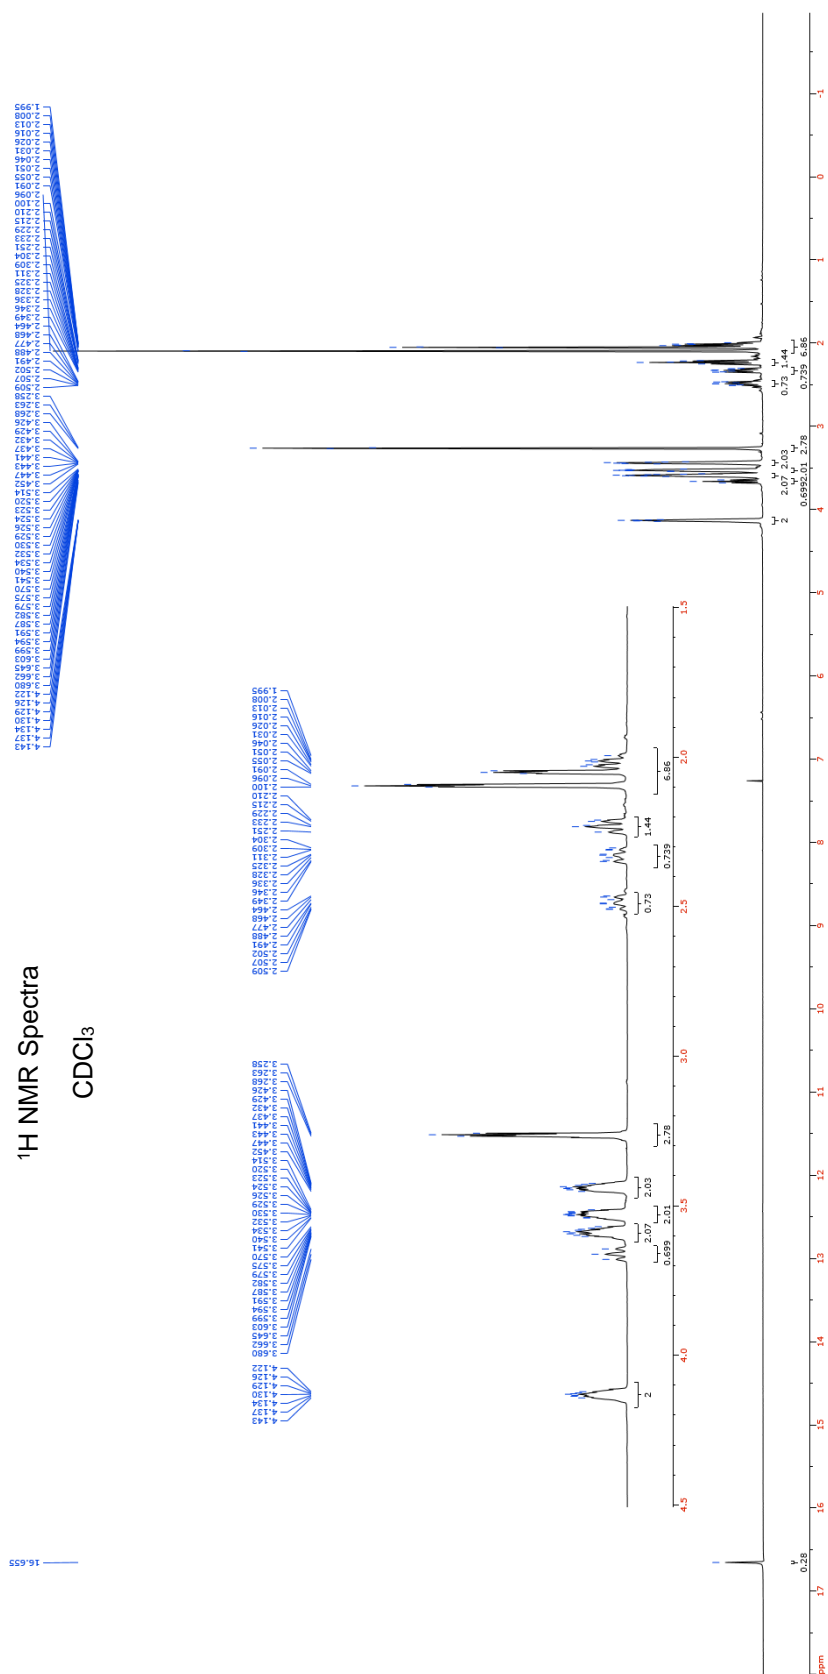

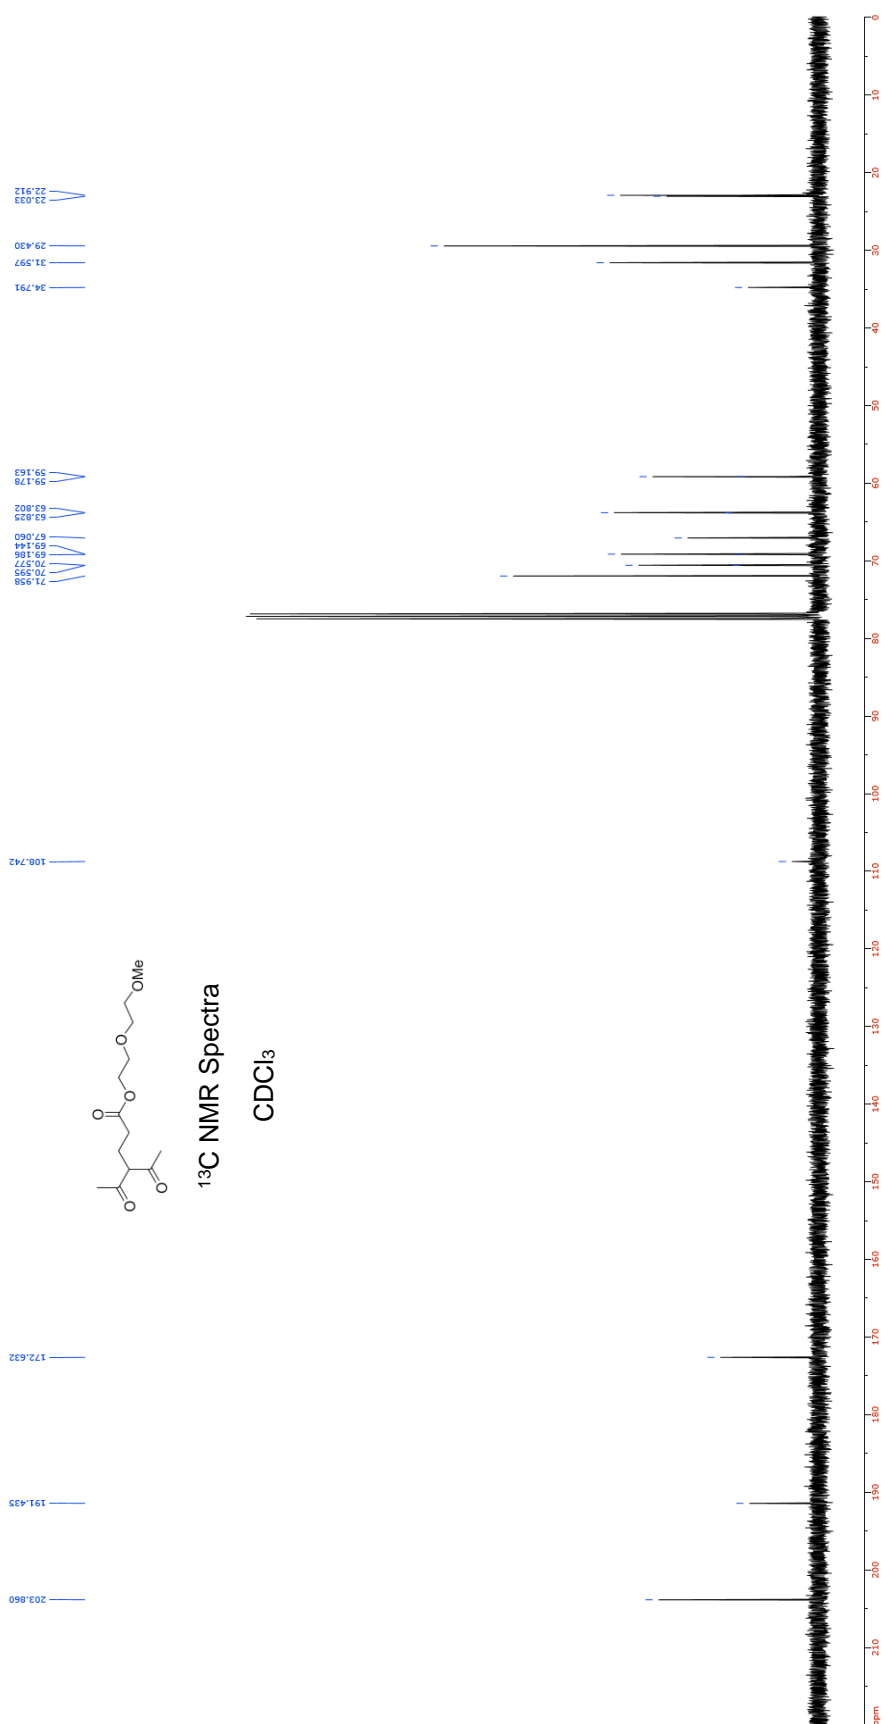

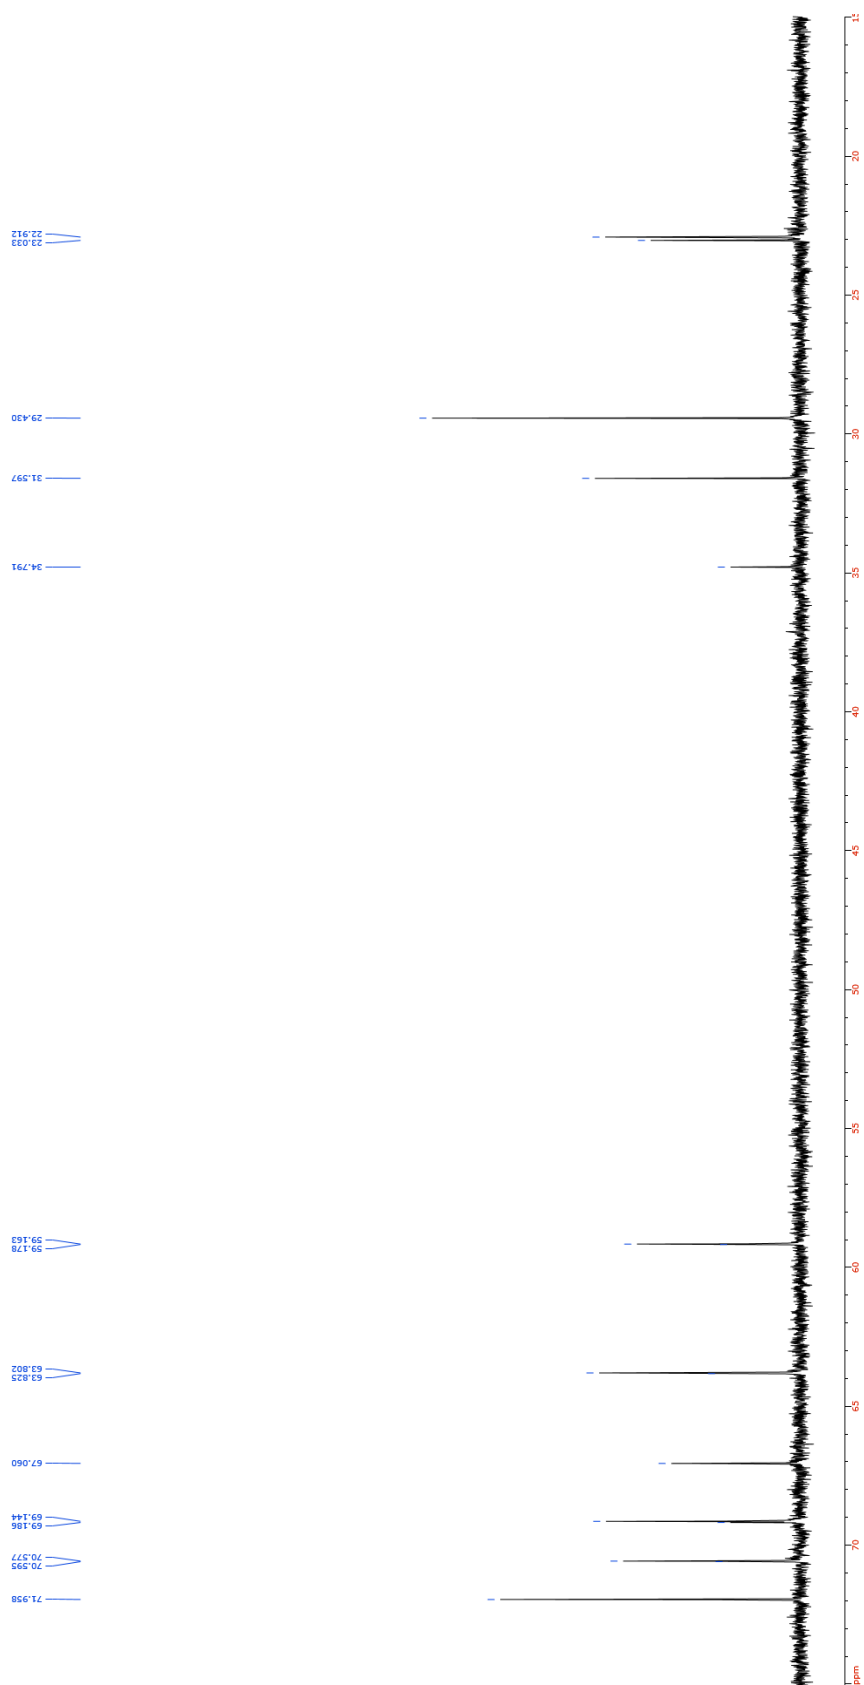



### Solubility Measurements

The solubility of complexes **1** – **15** in acetonitrile were determined as per the general procedure outlined in the full paper. The concentration of standard solutions, dilution factors for saturated solutions and wavelengths of absorption for each complex are listed in Table S1.

| Complex | $\lambda$ abs. (nm) | Standard Solutions (mM) | Saturated Solution Dilutions | Max. Solubility in MeCN                        |
|---------|---------------------|-------------------------|------------------------------|------------------------------------------------|
| 1       | 550                 | 1.0, 5.0, 10.0, 20.0    | 70 $\mu$ L into 5 mL         | $0.653 \pm 0.003$ M                            |
| 2       | 570                 | 1.0, 5.0, 10.0, 15.0    | 250 $\mu$ L into 10 mL       | $0.404 \pm 0.002$ M<br>$0.00212 \pm 0.00002$ M |
| 3       | 564                 | 0.05, 0.10, 0.50, 1.00  | 1.25 mL into 5 mL            | $0.0547 \pm 0.0003$ M                          |
| 4       | 558                 | 1.0, 5.0, 10.0, 20.0    | 500 $\mu$ L into 5 mL        | $1.92 \pm 0.04$ M                              |
| 5       | 564                 | 1.0, 5.0, 10.0, 20.0    | 25 $\mu$ L into 5 mL         | $0.43 \pm 0.02$ M                              |
| 6       | 567                 | 1.0, 5.0, 10.0, 20.0    | 200 $\mu$ L into 10 mL       | $5.7 \times 10^{-5} \pm 7 \times 10^{-6}$ M    |
| 7       | 366                 | 0.02, 0.03, 0.06, 0.13  | 250 $\mu$ L into 5 mL        | $7.99 \times 10^{-4} \pm 4 \times 10^{-7}$ M   |
| 8       | 418                 | 0.03, 0.06, 0.13, 0.25  | 1.25 mL into 5 mL            | $0.0434 \pm 0.0003$ M                          |
| 9       | 564                 | 1.0, 5.0, 10.0, 20.0    | 1 mL into 5 mL               | $0.86 \pm 0.05$ M                              |
| 10      | 571                 | 1.0, 5.0, 10.0, 15.0    | 50 $\mu$ L into 5 mL         | $1.25 \pm 0.01$ M                              |
| 11      | 566                 | 1.0, 5.0, 10.0, 20.0    | 50 $\mu$ L into 5 mL         | $1.13 \pm 0.01$ M                              |
| 12      | 572                 | 1.0, 5.0, 10.0, 15.0    | 50 $\mu$ L into 5 mL         | $1.80 \pm 0.04$ M                              |
| 13      | 572                 | 1.0, 5.0, 10.0, 15.0    | 25 $\mu$ L into 5 mL         | $1.32 \pm 0.04$ M                              |
| 15      | 600                 | 1.0, 5.0, 10.0, 20.0    | 20 $\mu$ L into 5 mL         |                                                |

**Table S1:** Solubility parameters and determinations for complexes **1** – **13** and **15** in acetonitrile.

| Complex | $\lambda$ abs. (nm) | Experimental $\epsilon$ (cm <sup>-1</sup> ·M <sup>-1</sup> ) | Literature $\epsilon$ (cm <sup>-1</sup> ·M <sup>-1</sup> )   |
|---------|---------------------|--------------------------------------------------------------|--------------------------------------------------------------|
| 1       | 550                 | 51.48                                                        | 72.44 ( $\lambda$ = 560 nm, CHCl <sub>3</sub> ) <sup>1</sup> |
| 2       | 570                 | 45.35                                                        | 39.81 ( $\lambda$ = 550 nm, EtOH) <sup>2</sup>               |
| 3       | 564                 | 74.41                                                        | 83.18 ( $\lambda$ = 570 nm, CHCl <sub>3</sub> ) <sup>1</sup> |
| 4       | 558                 | 71.56                                                        | 70.79 ( $\lambda$ = 558 nm, CHCl <sub>3</sub> ) <sup>1</sup> |
| 5       | 564                 | 65.9                                                         | ~80 ( $\lambda$ = 56 nm, not reported) <sup>3</sup>          |
| 6       | 567                 | 78.56                                                        | -                                                            |
| 7       | 366                 | 19012                                                        | 28183 ( $\lambda$ = 360 nm, CHCl <sub>3</sub> ) <sup>1</sup> |
| 8       | 418                 | 6442                                                         | -                                                            |
| 9       | 564                 | 76.92                                                        | -                                                            |
| 10      | 571                 | 69.30                                                        | N/A                                                          |
| 11      | 566                 | 74.64                                                        | N/A                                                          |
| 12      | 572                 | 68.66                                                        | N/A                                                          |
| 13      | 572                 | 65.91                                                        | N/A                                                          |
| 15      | 600                 | 74.51                                                        | N/A                                                          |

**Table S2:** Experimental extinction coefficients for complexes **1** – **13** and **15** in acetonitrile and a comparison to literature values where appropriate.

### **X-Ray Structure Determination**

**Complex 6:** Purple blocks of **6** were grown from a hexanes/benzene solution of the complex at 25 °C. A crystal of dimensions 0.18 x 0.08 x 0.07 mm was mounted on a Rigaku AFC10K Saturn 944+ CCD-based X-ray diffractometer equipped with a low temperature device and Micromax-007HF Cu-target micro-focus rotating anode ( $\lambda = 1.54187$  Å) operated at 1.2 kW power (40 kV, 30 mA). The X-ray intensities were measured at 85(1) K with the detector placed at a distance 42.00 mm from the crystal. A total of 3805 images were collected with an oscillation width of 1.0° in  $\omega$ . The exposure time was 1 sec. for the low angle images, 4 sec. for high angle. The integration of the data yielded a total of 69181 reflections to a maximum  $2\theta$  value of 136.48° of which 4837 were independent and 4520 were greater than  $2\sigma(I)$ . The final cell constants (Table S3) were based on the xyz centroids 34219 reflections above  $10\sigma(I)$ . Analysis of the data showed negligible decay during data collection; the data were processed with CrystalClear 2.0 and corrected for absorption. The structure was solved and refined with the Bruker SHELXTL (version 2008/4) software package, using the space group P2(1)/c with  $Z = 4$  for the formula  $C_{21}H_{24}N_3O_6Cr$ ,  $C_6H_6$ . Full matrix least-squares refinement based on  $F^2$  converged at  $R1 = 0.0354$  and  $wR2 = 0.1012$  [based on  $I > 2\sigma(I)$ ],  $R1 = 0.0400$  and  $wR2 = 0.1195$  for all data. Additional details are presented in Table S3 and are given as Supporting Information in a CIF file.

|                                      |                                                                                                                                        |
|--------------------------------------|----------------------------------------------------------------------------------------------------------------------------------------|
| Identification code                  | Complex <b>5</b>                                                                                                                       |
| Empirical formula                    | $C_{27} H_{30} Cr N_3 O_6$                                                                                                             |
| Formula weight                       | 544.54                                                                                                                                 |
| Temperature                          | 85(2) K                                                                                                                                |
| Wavelength                           | 1.54178 Å                                                                                                                              |
| Crystal system, space group          | Monoclinic, P2(1)/c                                                                                                                    |
| Unit cell dimensions                 | $a = 12.7622(16)$ Å, $\alpha = 90^\circ$<br>$b = 15.3268(3)$ Å, $\beta = 114.351(9)^\circ$<br>$c = 14.8815(11)$ Å, $\gamma = 90^\circ$ |
| Volume                               | $2651.9(4)$ Å <sup>3</sup>                                                                                                             |
| Z, Calculated density                | 4, 1.364 Mg/m <sup>3</sup>                                                                                                             |
| Absorption coefficient               | $3.935$ mm <sup>-1</sup>                                                                                                               |
| F(000)                               | 1140                                                                                                                                   |
| Crystal size                         | 0.18 x 0.08 x 0.07 mm                                                                                                                  |
| Theta range for data collection      | 4.35 to 68.24 °                                                                                                                        |
| Limiting indices                     | $-15 \leq h \leq 15$ , $-18 \leq k \leq 18$ , $-17 \leq l \leq 16$                                                                     |
| Reflections collected / unique       | 69181 / 4837 [ $R(int) = 0.0681$ ]                                                                                                     |
| Completeness to $\theta = 68.24$     | 99.90%                                                                                                                                 |
| Absorption correction                | Semi-empirical from equivalents                                                                                                        |
| Max. and min. transmission           | 0.7702 and 0.5377                                                                                                                      |
| Refinement method                    | Full-matrix least-squares on $F^2$                                                                                                     |
| Data / restraints / parameters       | 4837 / 0 / 340                                                                                                                         |
| Goodness-of-fit on $F^2$             | 1.181                                                                                                                                  |
| Final R indices [ $I > 2\sigma(I)$ ] | $R1 = 0.0354$ , $wR2 = 0.1012$                                                                                                         |
| R indices (all data)                 | $R1 = 0.0400$ , $wR2 = 0.1195$                                                                                                         |
| Largest diff. peak and hole          | 0.304 and -0.577 e.Å <sup>-3</sup>                                                                                                     |

**Table S3:** Crystal data and structure refinement for complex **5**.

**Complex 8:** Green blocks of complex **8** were grown from a chloroform/hexanes solution at 25 °C. A crystal of dimensions 0.13 x 0.12 x 0.07 mm was mounted on a Bruker SMART APEX-I CCD-based X-ray diffractometer equipped with a low temperature device and fine focus Mo-target X-ray tube ( $\lambda = 0.71073$  Å) operated at 1500 W power (50 kV, 30 mA). The X-ray intensities were measured at 85(1) K; the detector was placed at a distance 5.070 cm from the crystal. A total of 4460 frames were collected with a scan width of 0.5° in  $\omega$  and 0.45° in  $\phi$  with an exposure time of 30 s/frame. The integration of the data yielded a total of 87026 reflections to a maximum  $2\theta$  value of 74.16° of which 14372 were independent and 10727 were greater than  $2\sigma(I)$ . The final cell constants (Table S4) were based on the xyz centroids of 9870 reflections above  $10\sigma(I)$ . Analysis of the data showed negligible decay during data collection; the data were processed with SADABS and corrected for absorption. The structure was solved and refined with the Bruker SHELXTL (version 2008/4) software package, using the space group  $P1bar$  with  $Z = 2$  for the formula  $C_{35}H_{29}O_6Cr$ . All non-hydrogen atoms were refined anisotropically with the hydrogen atoms placed in idealized positions. Full matrix least-squares refinement based on  $F^2$  converged at  $R1 = 0.0468$  and  $wR2 = 0.1090$  [based on  $I > 2\sigma(I)$ ],  $R1 = 0.0722$  and  $wR2 = 0.1231$  for all data. Additional details are presented in Table S4 and are given as Supporting Information in a CIF file.

|                                      |                                                                                                                                                          |
|--------------------------------------|----------------------------------------------------------------------------------------------------------------------------------------------------------|
| Identification code                  | Complex <b>8</b>                                                                                                                                         |
| Empirical formula                    | $C_{35}H_{29}CrO_6$                                                                                                                                      |
| Formula weight                       | 597.58                                                                                                                                                   |
| Temperature                          | 85(2) K                                                                                                                                                  |
| Wavelength                           | 0.71073 Å                                                                                                                                                |
| Crystal system, space group          | Triclinic, $P1$                                                                                                                                          |
| Unit cell dimensions                 | $a = 10.1881(2)$ Å, $\alpha = 94.4750(10)^\circ$<br>$b = 10.8140(2)$ Å, $\beta = 92.6810(10)^\circ$<br>$c = 13.9887(3)$ Å, $\gamma = 112.3820(10)^\circ$ |
| Volume                               | $1415.84(5)$ Å <sup>3</sup>                                                                                                                              |
| Z, Calculated density                | 2, 1.402 Mg/m <sup>3</sup>                                                                                                                               |
| Absorption coefficient               | $0.451$ mm <sup>-1</sup>                                                                                                                                 |
| F(000)                               | 622                                                                                                                                                      |
| Crystal size                         | 0.13 x 0.12 x 0.7 mm                                                                                                                                     |
| Theta range for data collection      | 2.05 to $37.08^\circ$                                                                                                                                    |
| Limiting indices                     | $-17 \leq h \leq 17$ , $-18 \leq k \leq 18$ , $-23 \leq l \leq 23$                                                                                       |
| Reflections collected / unique       | 87026 / 14372 [ $R(int) = 0.0702$ ]                                                                                                                      |
| Completeness to $\theta = 37.08$     | 99.20%                                                                                                                                                   |
| Absorption correction                | Semi-empirical from equivalents                                                                                                                          |
| Max. and min. transmission           | 0.9691 and 0.9436                                                                                                                                        |
| Refinement method                    | Full-matrix least-squares on $F^2$                                                                                                                       |
| Data / restraints / parameters       | 14372 / 0 / 381                                                                                                                                          |
| Goodness-of-fit on $F^2$             | 1.036                                                                                                                                                    |
| Final R indices [ $I > 2\sigma(I)$ ] | $R1 = 0.0468$ , $wR2 = 0.109$                                                                                                                            |
| R indices (all data)                 | $R1 = 0.0722$ , $wR2 = 0.1231$                                                                                                                           |
| Largest diff. peak and hole          | 0.867 and $-0.419$ e.Å <sup>-3</sup>                                                                                                                     |

**Table S4:** Crystal data and structure refinement for complex **8**.

**Complex 9:** Orange blocks of complex **9** were grown from a chloroform/hexanes solution of the complex at 25 °C. A crystal of dimensions 0.18 x 0.14 x 0.13 mm was mounted on a Bruker SMART APEX-I CCD-based X-ray diffractometer equipped with a low temperature device and fine focus Mo-target X-ray tube ( $\lambda = 0.71073$  Å) operated at 1500 W power (50 kV, 30 mA). The X-ray intensities were measured at 85(1) K; the detector was placed at a distance 5.070 cm from the crystal. A total of 2425 frames were collected with a scan width of 0.5° in  $\omega$  and 0.45° in  $\phi$  with an exposure time of 30 s/frame. The integration of the data yielded a total of 223213 reflections to a maximum  $2\theta$  value of 56.64° of which 28072 were independent and 17169 were greater than  $2\sigma(I)$ . The final cell constants (Table S5) were based on the xyz centroids of 9951 reflections above  $10\sigma(I)$ . Analysis of the data showed negligible decay during data collection; the data were processed with SADABS and corrected for absorption. The structure was solved and refined with the Bruker SHELXTL (version 2008/4) software package, using the space group P2(1)/n with  $Z = 20$  for the formula  $C_{25}H_{25}O_6Cr$ . All non-hydrogen atoms were refined anisotropically with the hydrogen atoms placed in idealized positions. Full matrix least-squares refinement based on  $F^2$  converged at  $R1 = 0.0587$  and  $wR2 = 0.1446$  [based on  $I > 2\sigma(I)$ ],  $R1 = 0.1040$  and  $wR2 = 0.1774$  for all data. Additional details are presented in Table S5 and are given as Supporting Information in a CIF file.

|                                      |                                                                                                                                    |
|--------------------------------------|------------------------------------------------------------------------------------------------------------------------------------|
| Identification code                  | Complex <b>8</b>                                                                                                                   |
| Empirical formula                    | $C_{25}H_{25}CrO_6$                                                                                                                |
| Formula weight                       | 473.45                                                                                                                             |
| Temperature                          | 85(2) K                                                                                                                            |
| Wavelength                           | 0.71073 Å                                                                                                                          |
| Crystal system, space group          | Monoclinic, P2(1)/n                                                                                                                |
| Unit cell dimensions                 | $a = 23.612(2)$ Å, $\alpha = 90^\circ$<br>$b = 14.2939(13)$ Å, $\beta = 95.048(2)^\circ$<br>$c = 33.570(3)$ Å, $\gamma = 90^\circ$ |
| Volume                               | $11286.3(18)$ Å <sup>3</sup>                                                                                                       |
| Z, Calculated density                | 20, 1.393 Mg/m <sup>3</sup>                                                                                                        |
| Absorption coefficient               | $0.545$ mm <sup>-1</sup>                                                                                                           |
| F(000)                               | 4940                                                                                                                               |
| Crystal size                         | 0.18 x 0.14 x 0.13 mm                                                                                                              |
| Theta range for data collection      | 1.01 to $28.32^\circ$                                                                                                              |
| Limiting indices                     | $-31 \leq h \leq 31$ , $-19 \leq k \leq 19$ , $-44 \leq l \leq 44$                                                                 |
| Reflections collected / unique       | 223213 / 28072 [ $R(\text{int}) = 0.0790$ ]                                                                                        |
| Completeness to $\theta = 28.32$     | 99.90%                                                                                                                             |
| Absorption correction                | Semi-empirical from equivalents                                                                                                    |
| Max. and min. transmission           | 0.9325 and 0.9082                                                                                                                  |
| Refinement method                    | Full-matrix least-squares on $F^2$                                                                                                 |
| Data / restraints / parameters       | 28072 / 0 / 1461                                                                                                                   |
| Goodness-of-fit on $F^2$             | 1.017                                                                                                                              |
| Final R indices [ $I > 2\sigma(I)$ ] | $R1 = 0.0587$ , $wR2 = 0.1446$                                                                                                     |
| R indices (all data)                 | $R1 = 0.1040$ , $wR2 = 0.1774$                                                                                                     |
| Largest diff. peak and hole          | 1.375 and $-0.414$ e.Å <sup>-3</sup>                                                                                               |

**Table S5:** Crystal data and structure refinement for complex **9**.

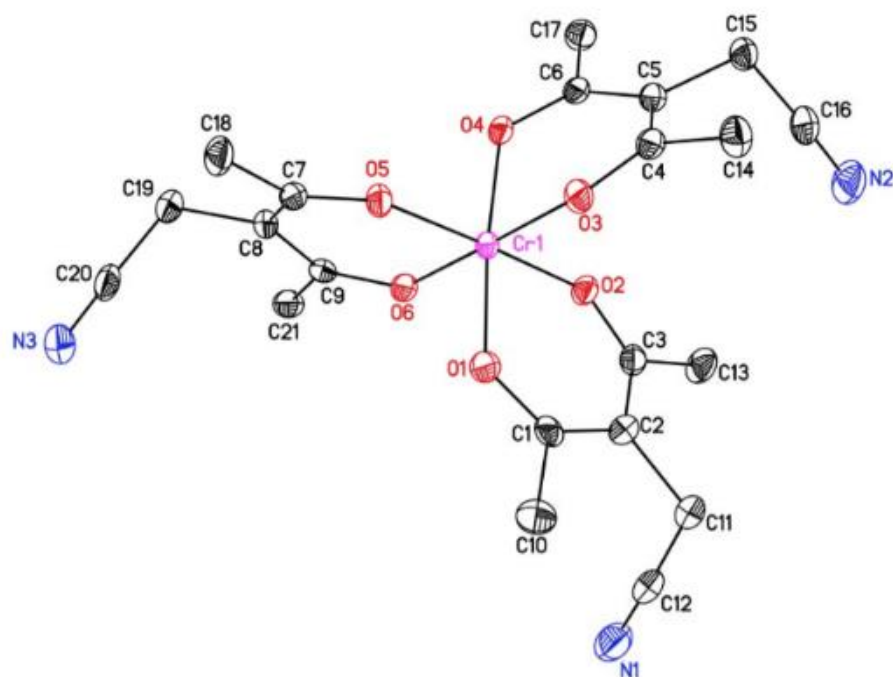

**Figure S1:** X-ray crystal structure of complex **6**.

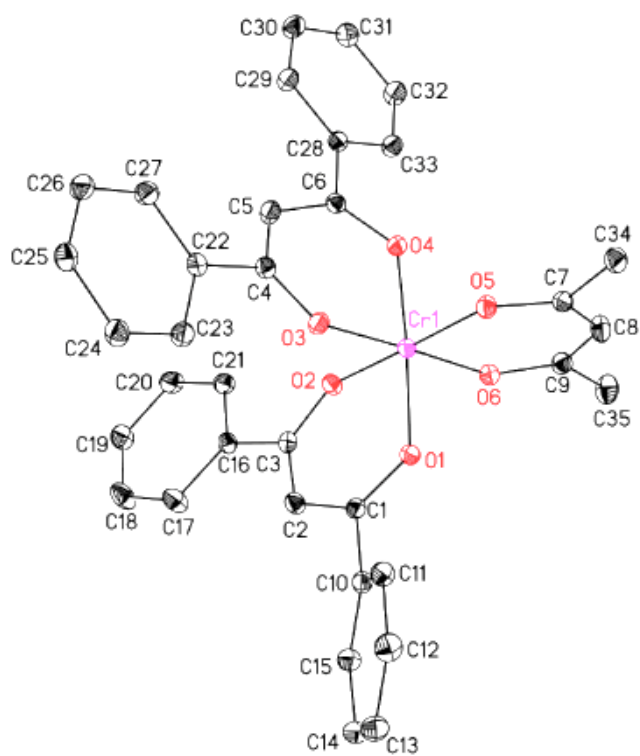

**Figure S2:** X-ray crystal structure of complex **8**.

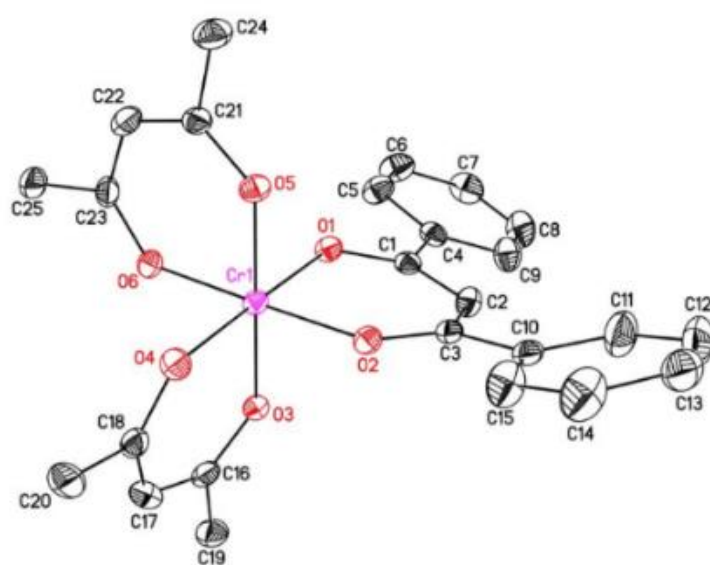

**Figure S3:** X-ray crystal structure of complex **9**.

### **Powder X-ray Diffraction Patterns**

PXRD data were recorded at room temperature on a Bruker AXS D8 Advance powder diffractometer at 40 kV, 40 mA with a CuK $\alpha$  source ( $\lambda=1.5406$  Å) between 5 and 30° 2 $\theta$  with a scan speed of 0.1 s/ step and a step size of 0.04. Samples were measured on a glass microscope slide in an aluminum holder.

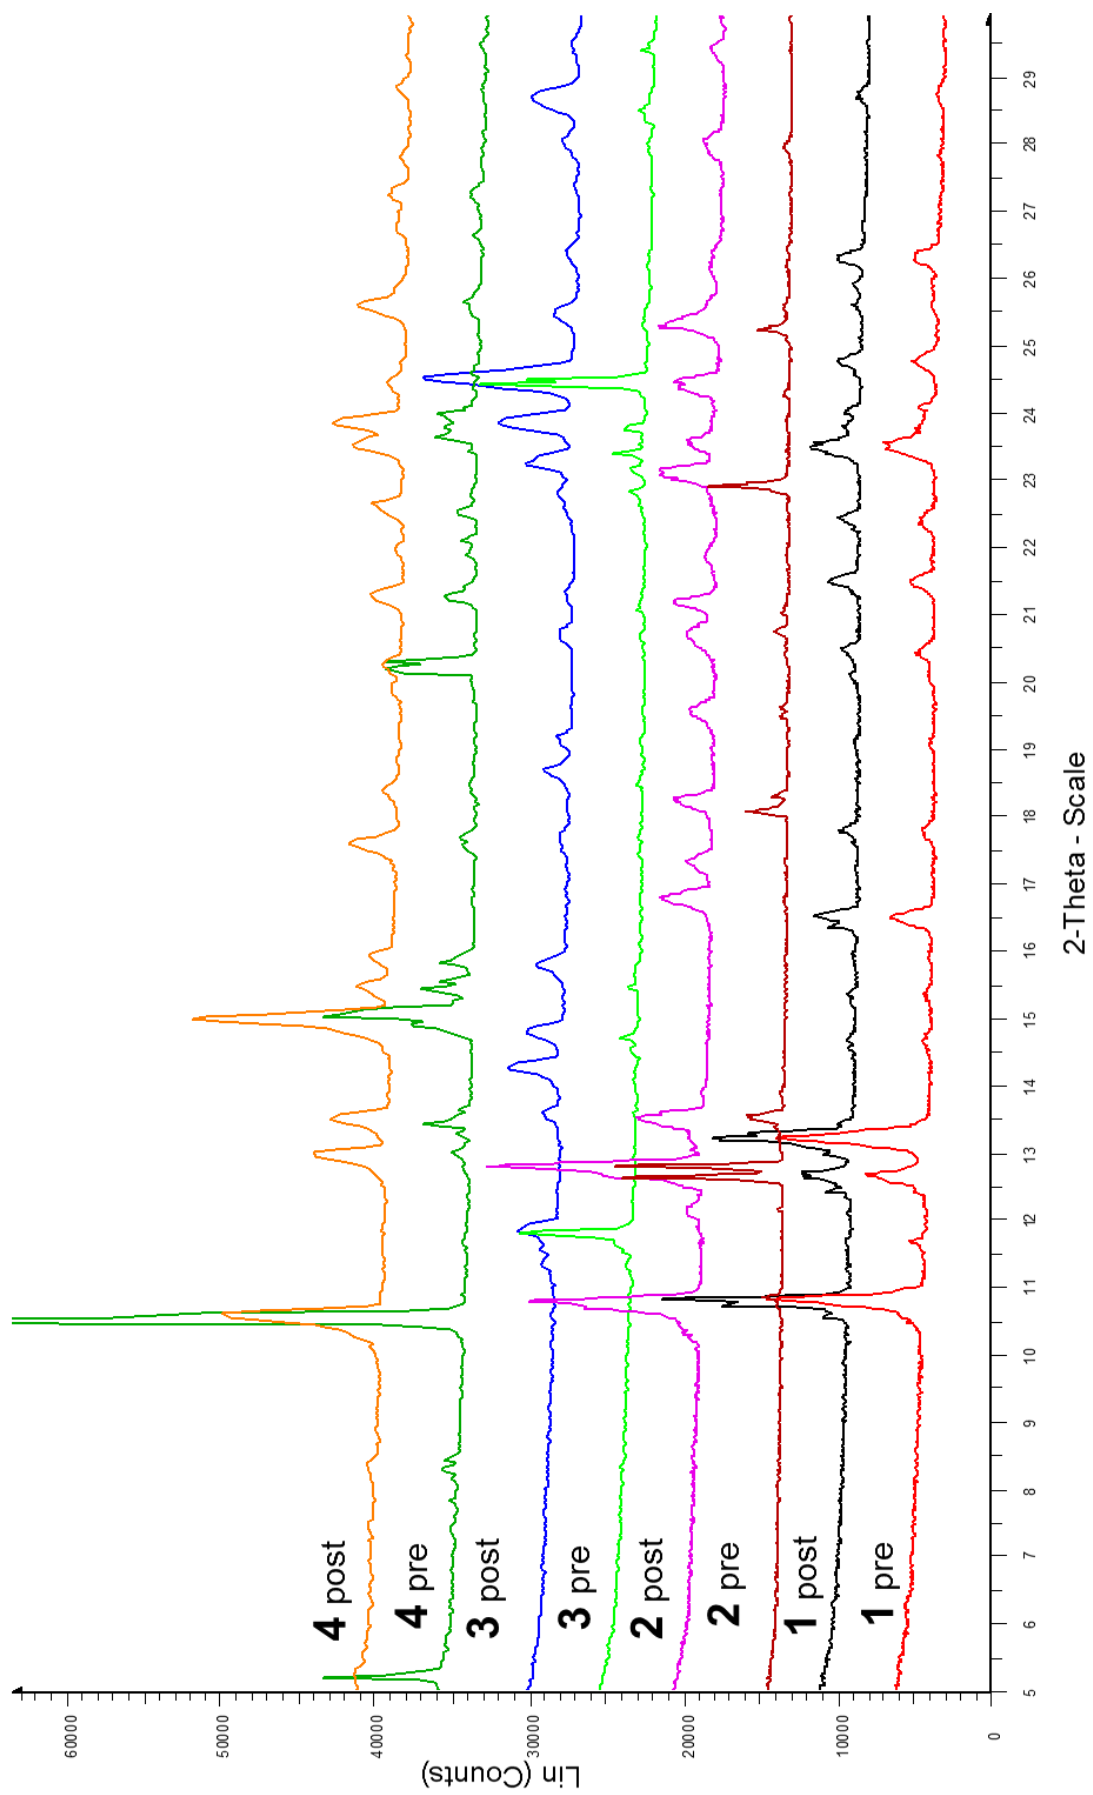



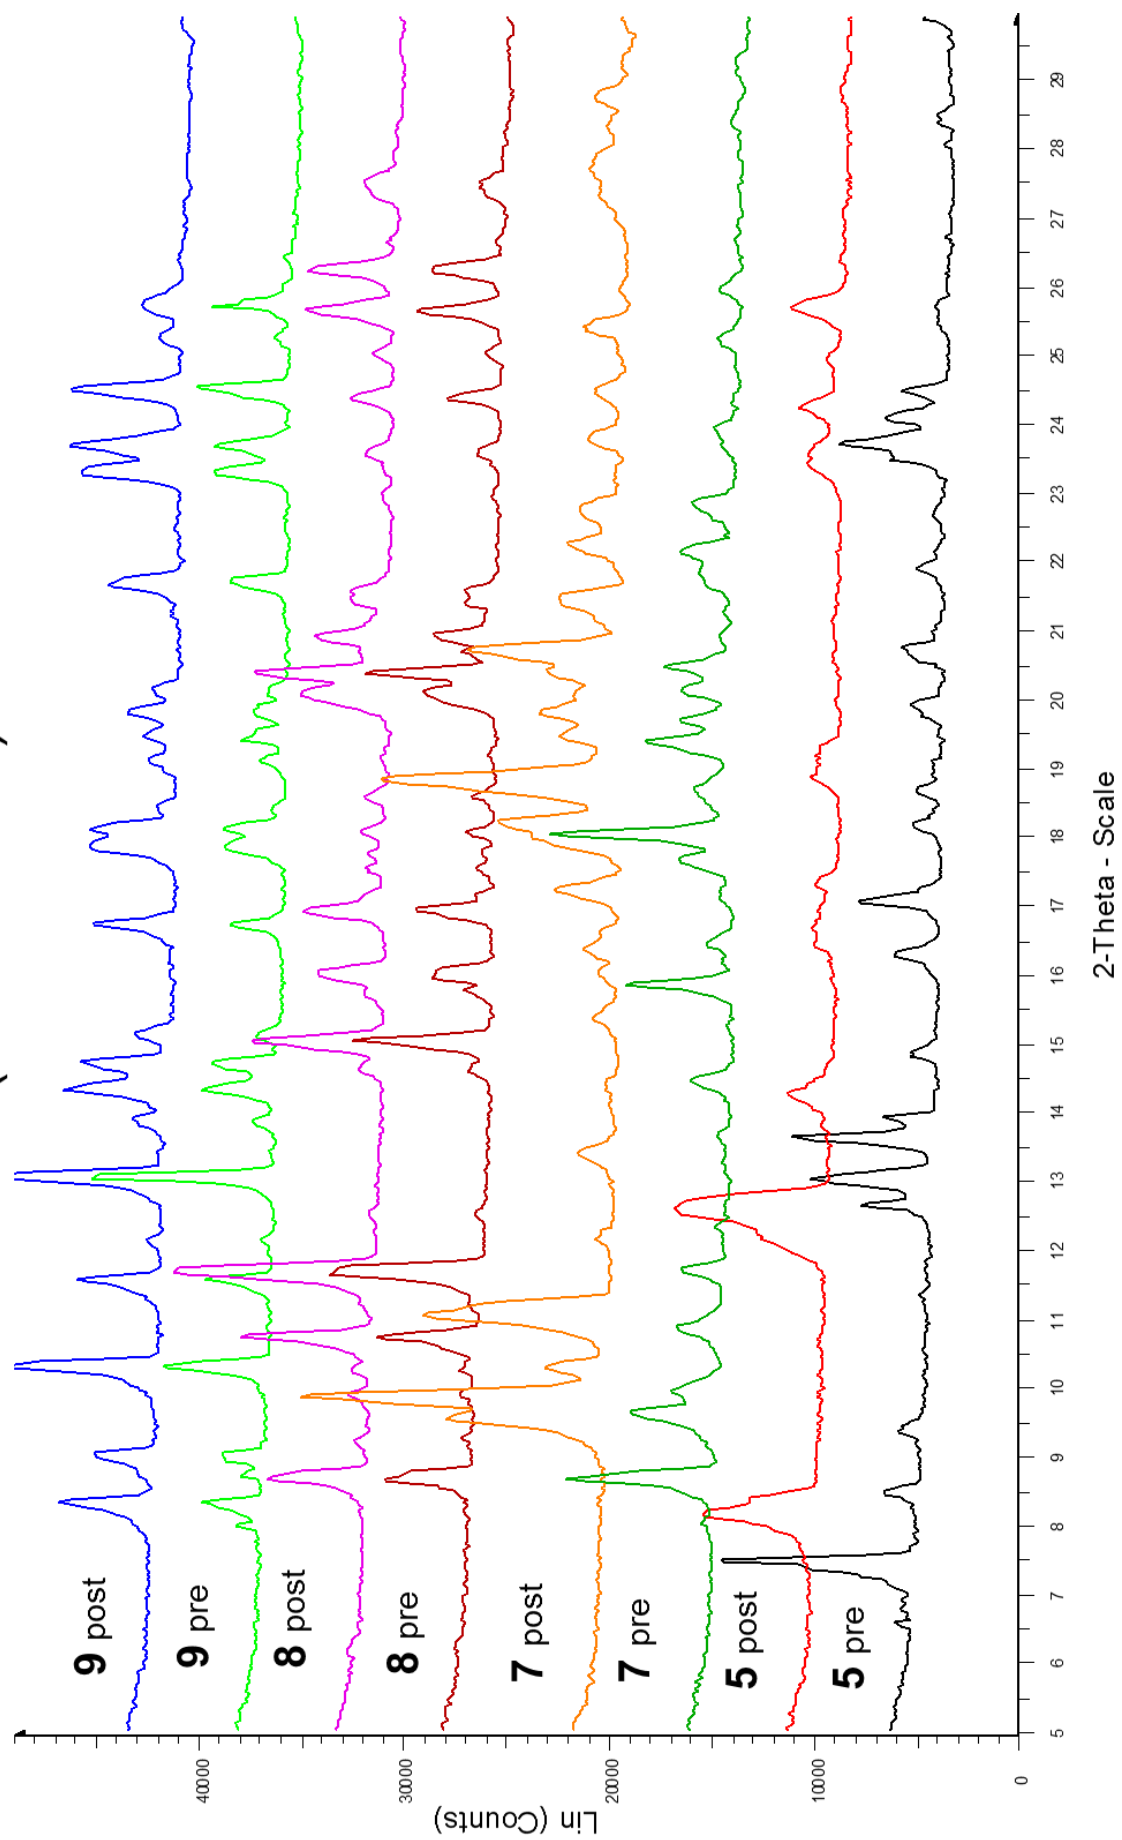

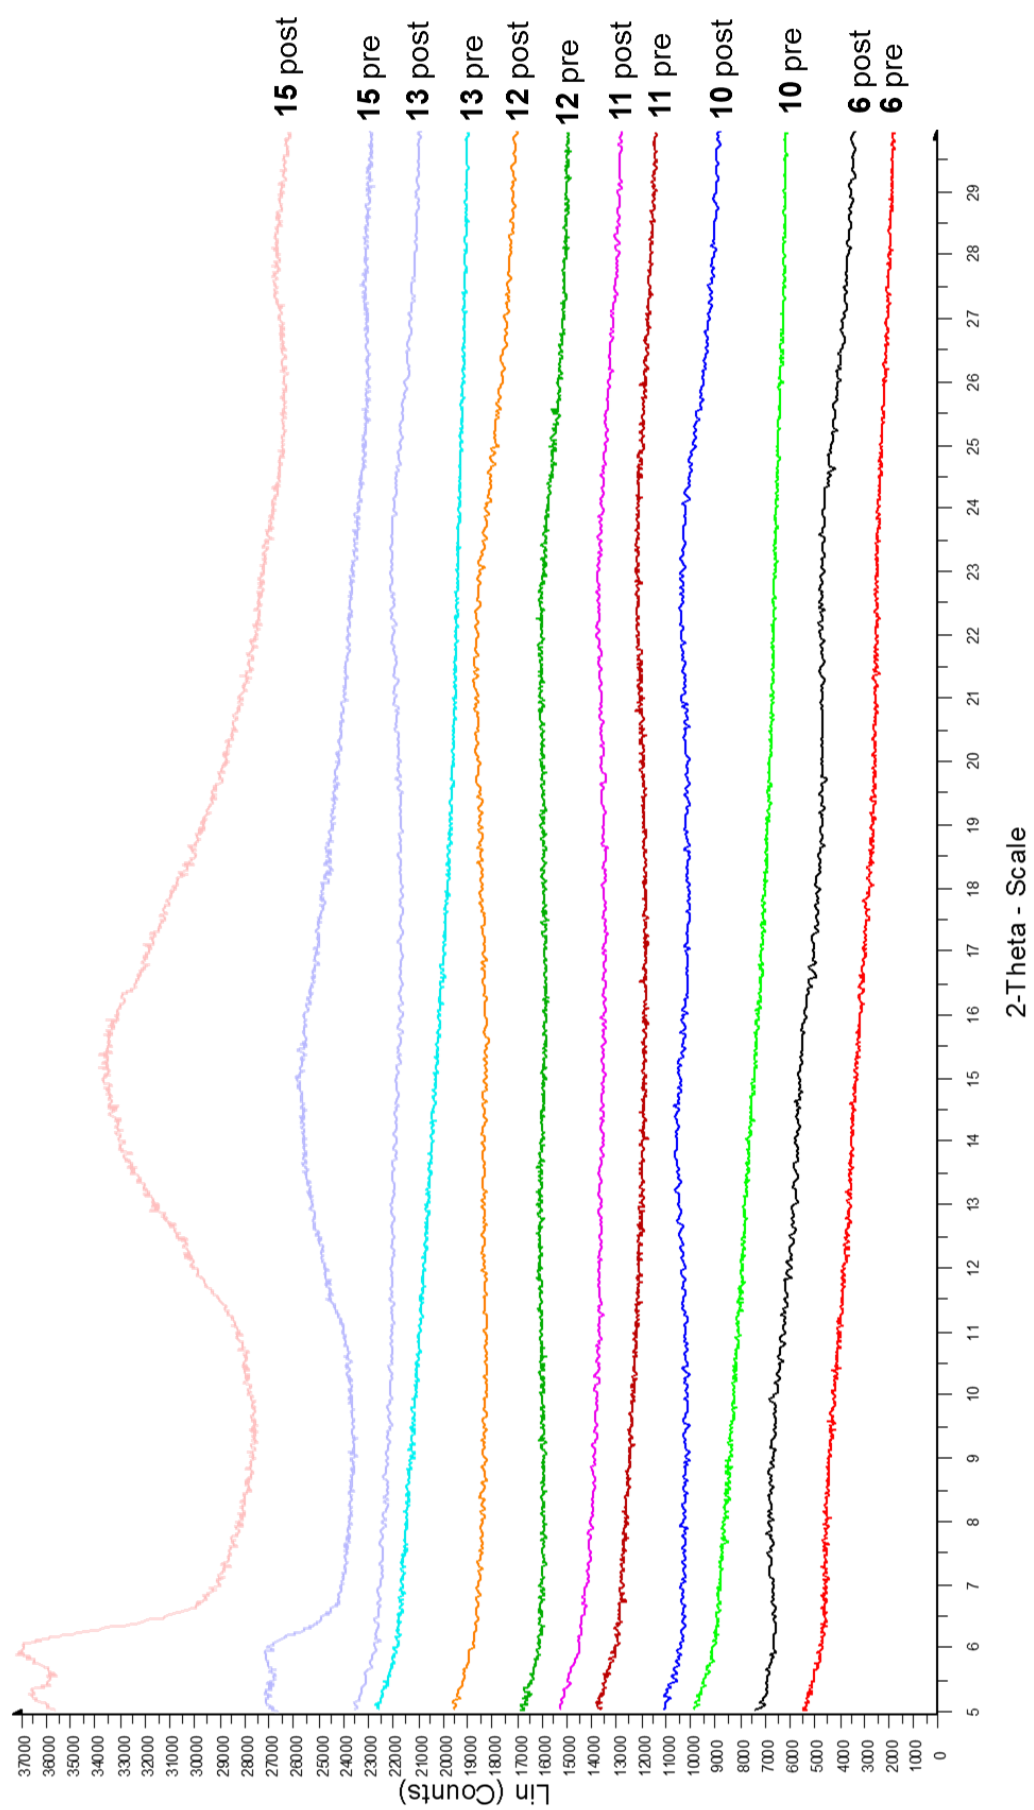

## Cyclic Voltammograms

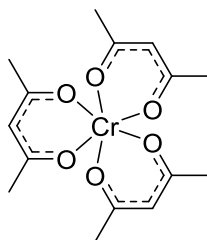

CV taken in acetonitrile using 0.01 M complex and 0.1 M TBABF<sub>4</sub>.

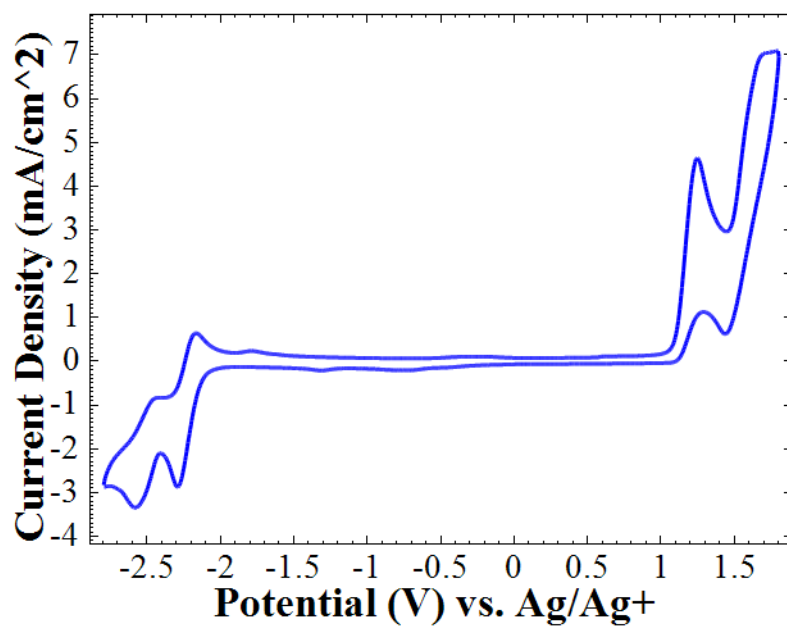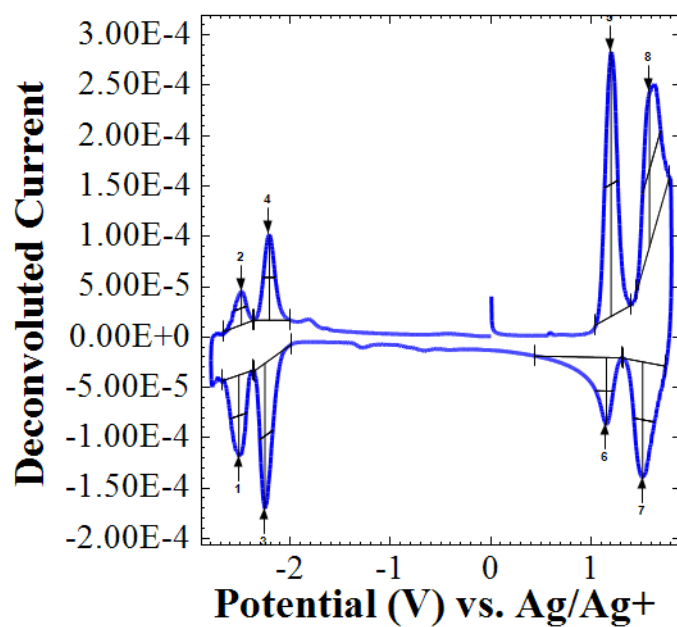

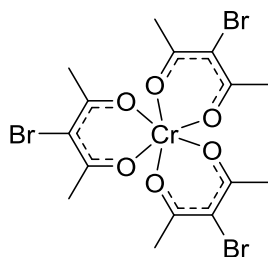

CV taken in acetonitrile using 0.001 M complex and 0.01 M TBABF<sub>4</sub>.

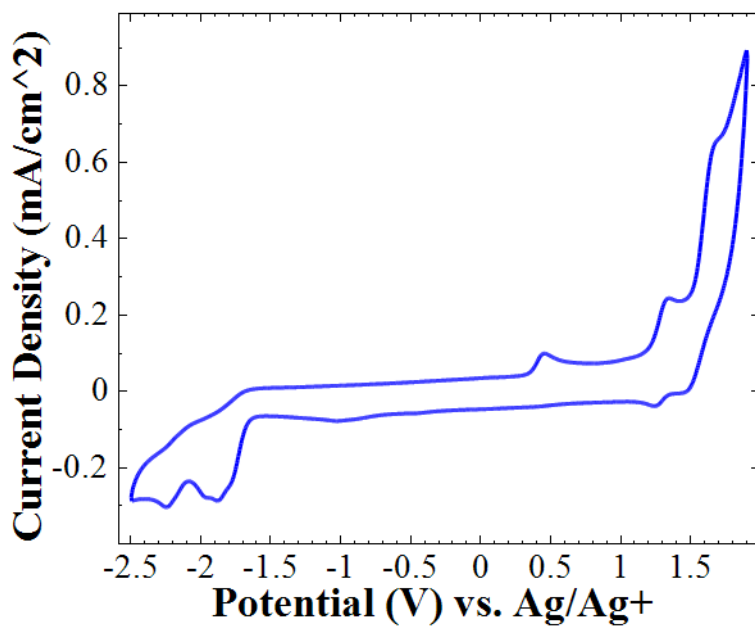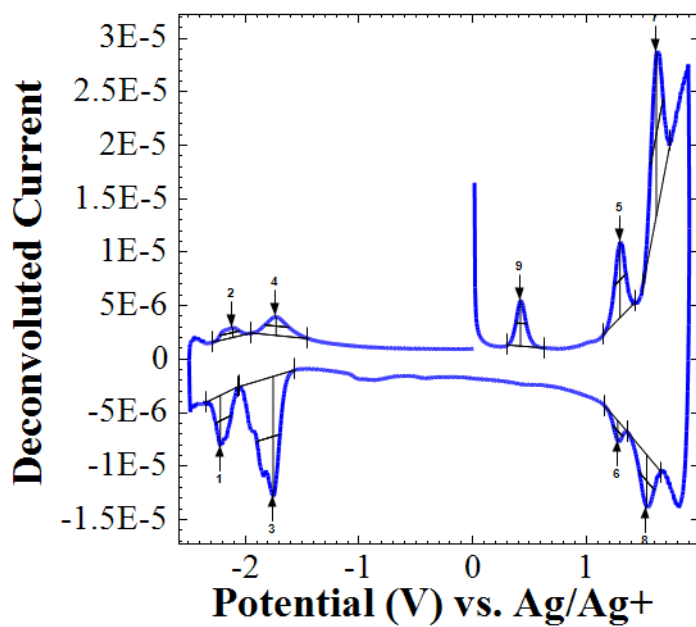

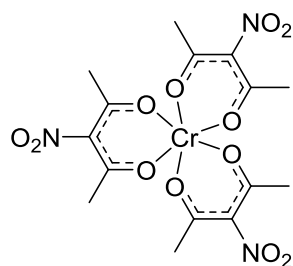

CV taken in acetonitrile using 0.001 M complex and 0.01 M TBABF<sub>4</sub>.

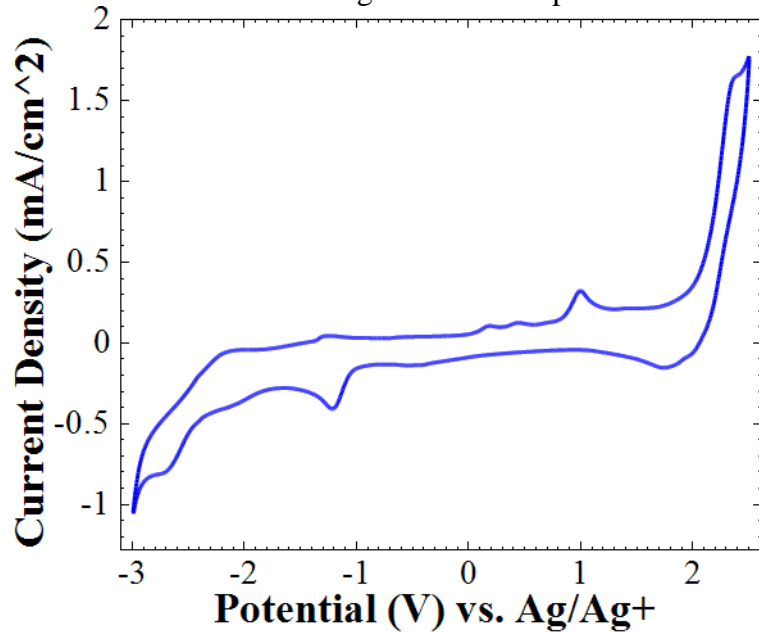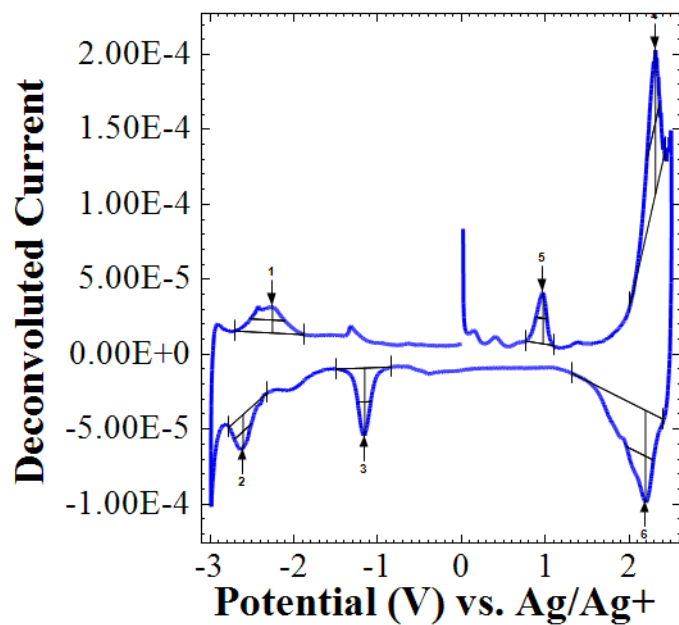

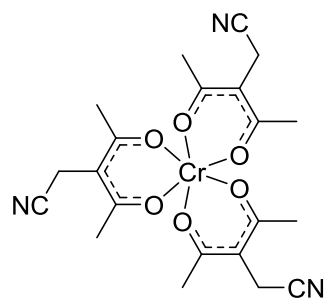

CV taken in acetonitrile using 0.01 M complex and 0.1 M TBABF<sub>4</sub>.

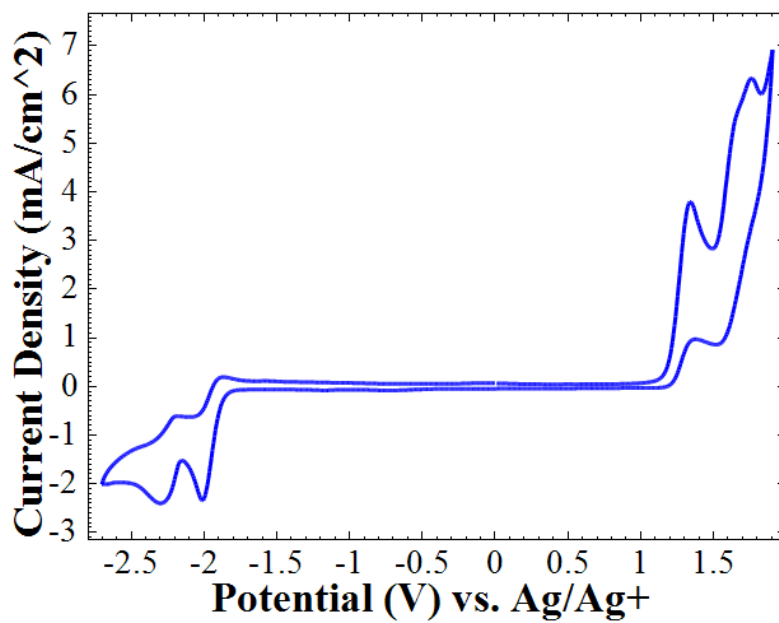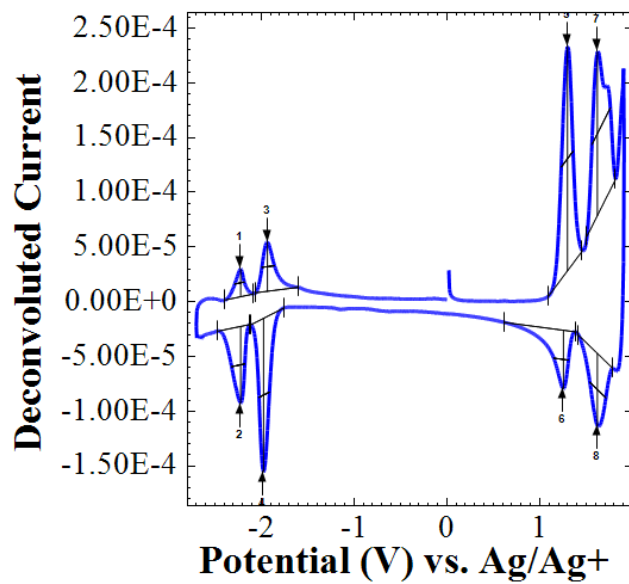

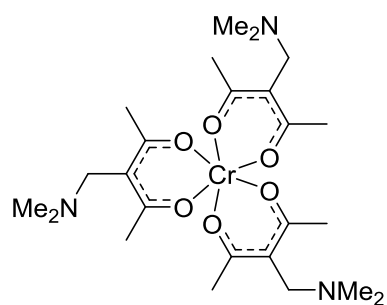

CV taken in acetonitrile using 0.01 M complex and 0.1 M TBABF<sub>4</sub>.

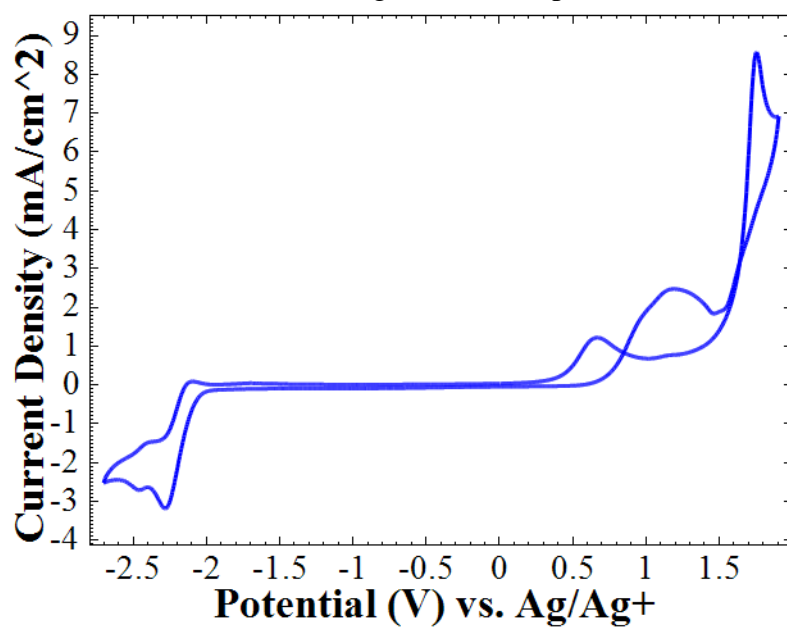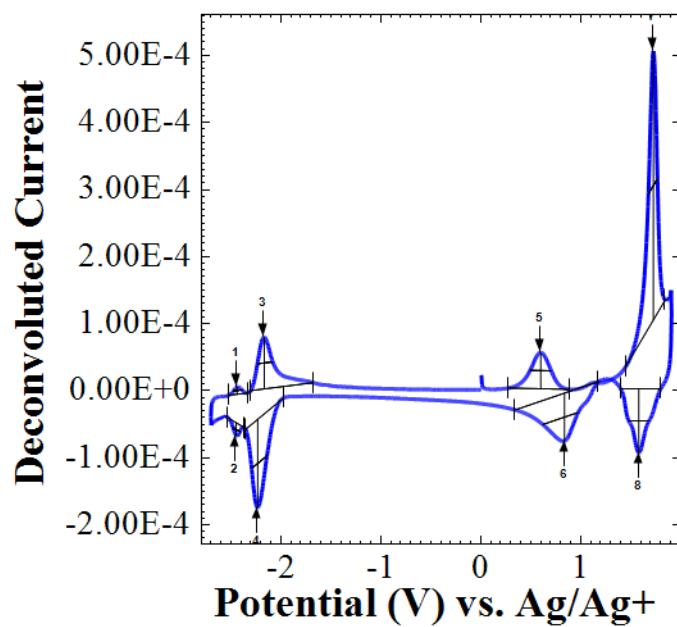

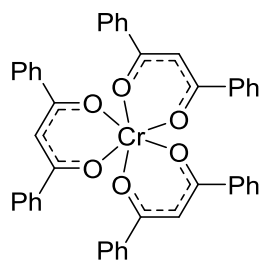

CV taken in acetonitrile using 0.00014 M complex and 0.1 M TBABF<sub>4</sub>.

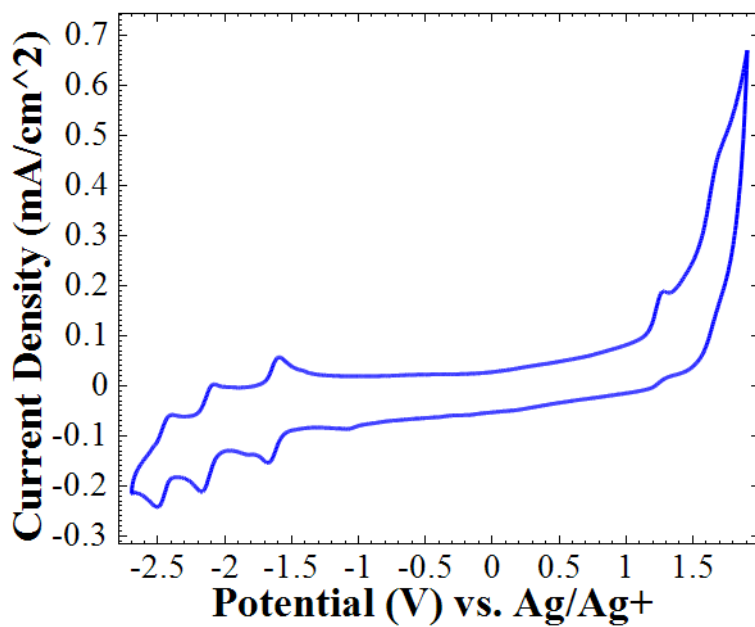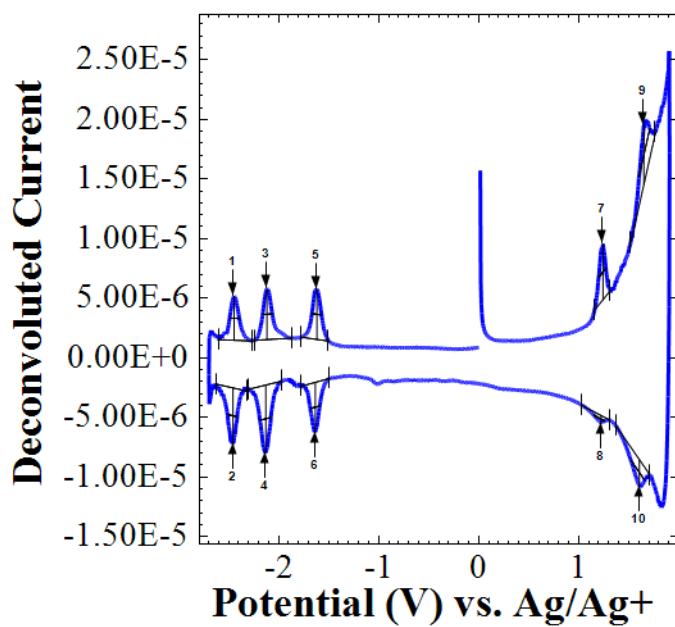



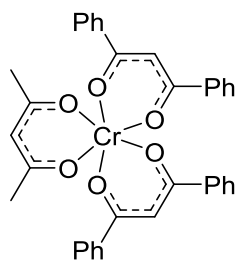

CV taken in acetonitrile using 0.001 M complex and 0.1 M TBABF<sub>4</sub>.

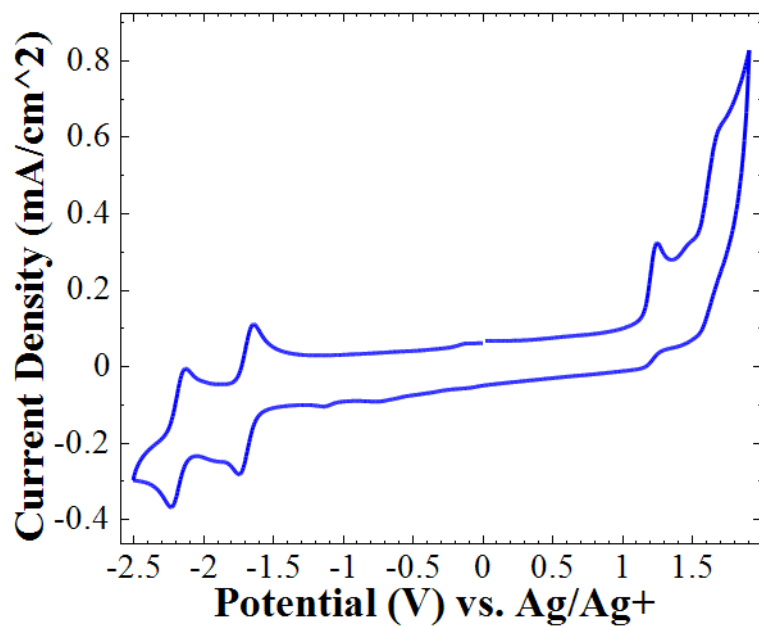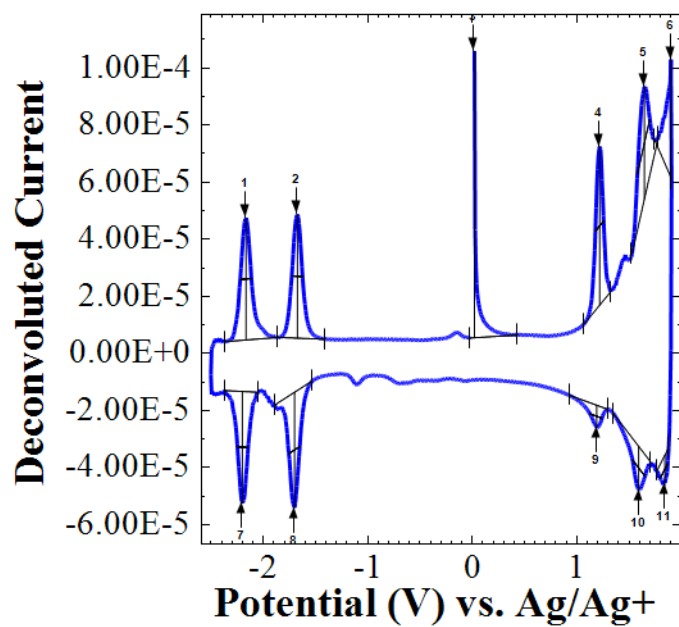

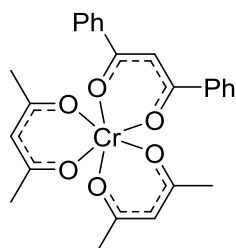

CV taken in acetonitrile using 0.001 M complex and 0.1 M TBABF<sub>4</sub>.

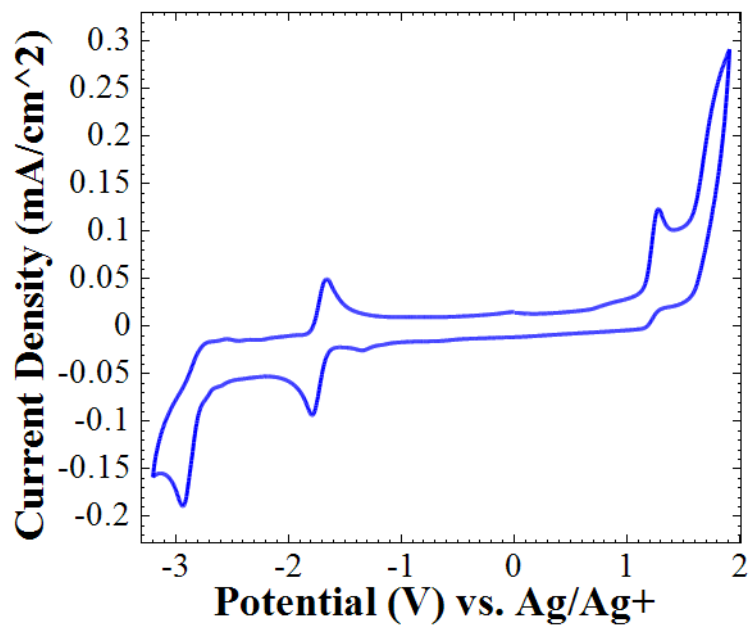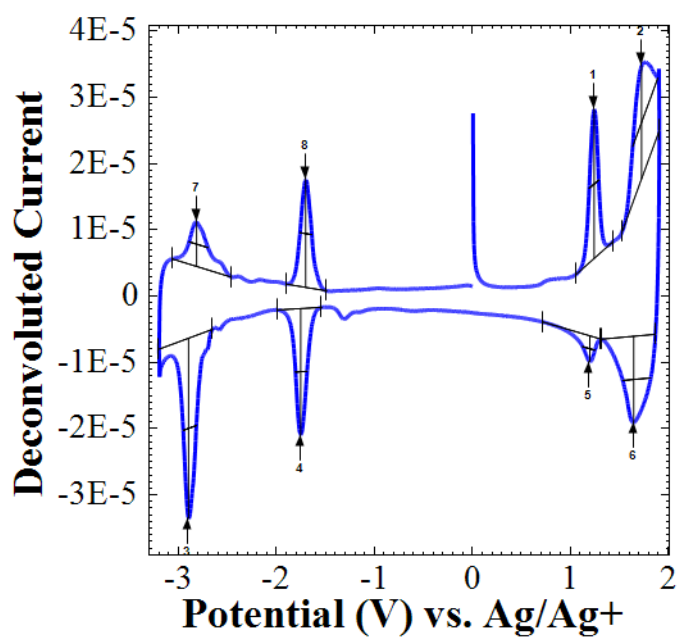

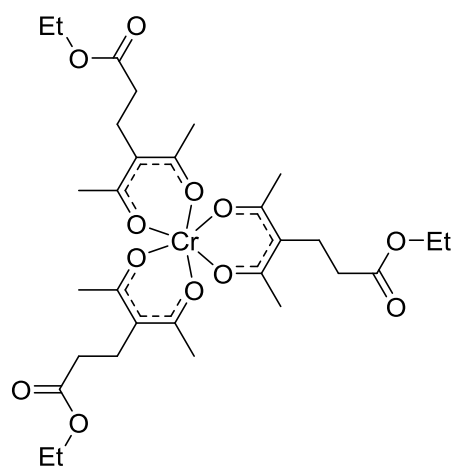

CV taken in acetonitrile using 0.001 M complex and 0.1 M TBABF<sub>4</sub>.

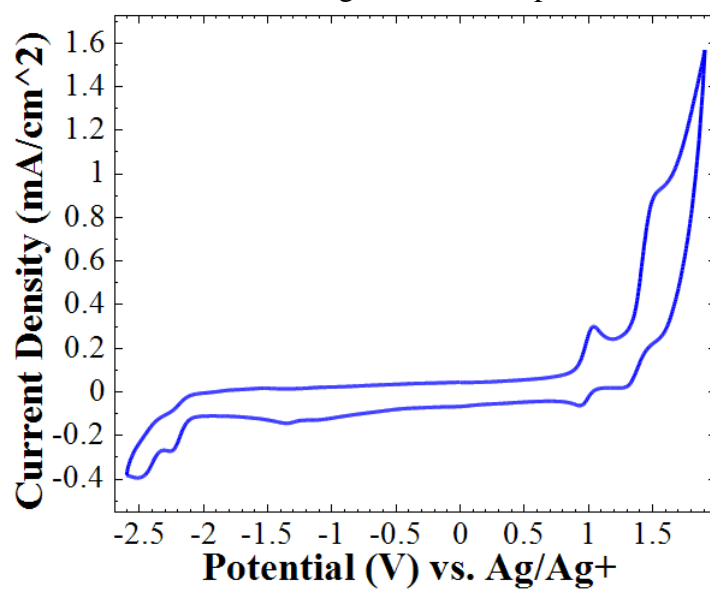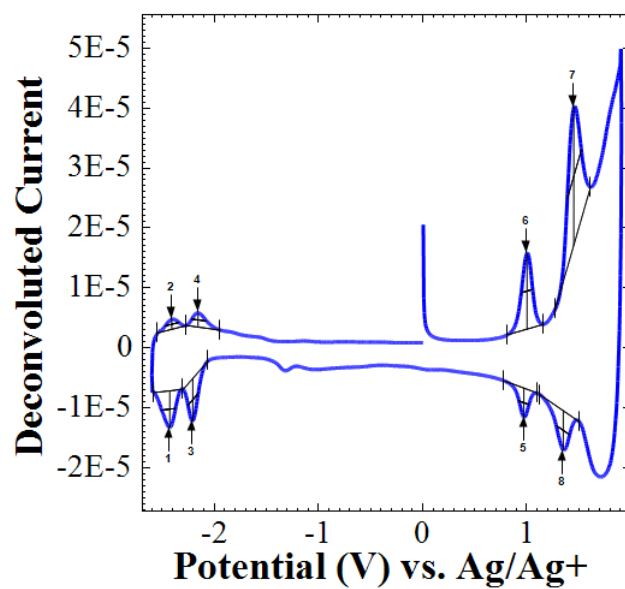

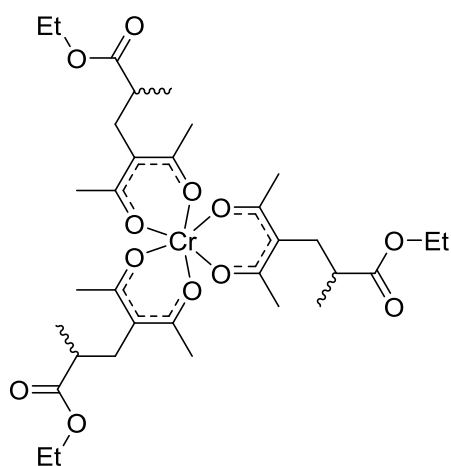

CV taken in acetonitrile using 0.01 M complex and 0.1 M TBABF<sub>4</sub>.

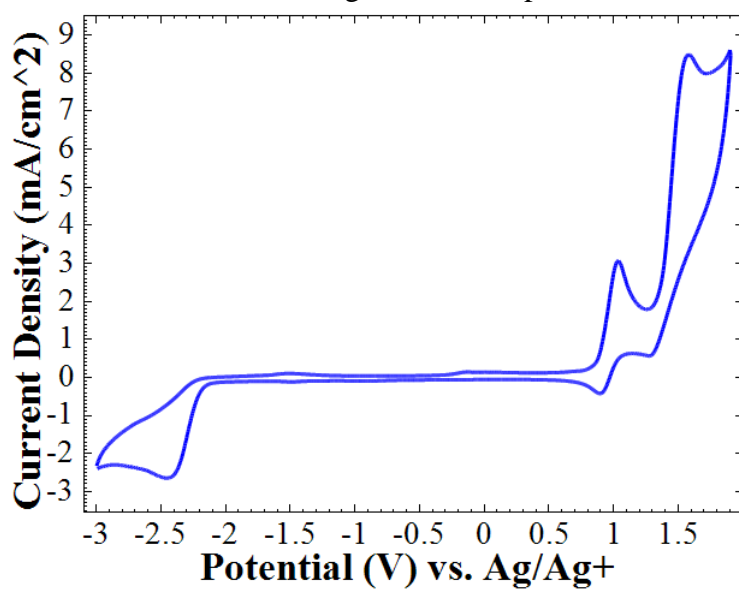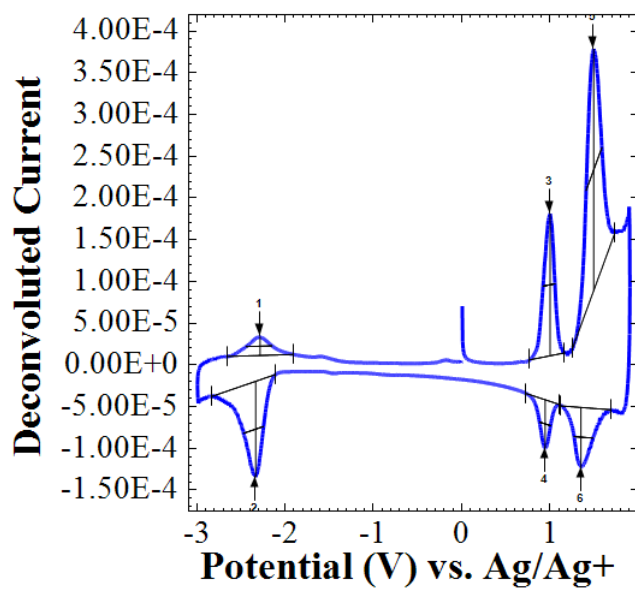

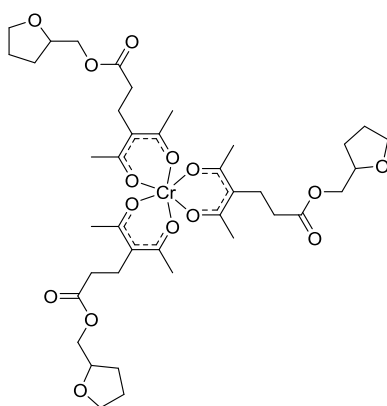

CV taken in acetonitrile using 0.01 M complex and 0.1 M TBABF<sub>4</sub>.

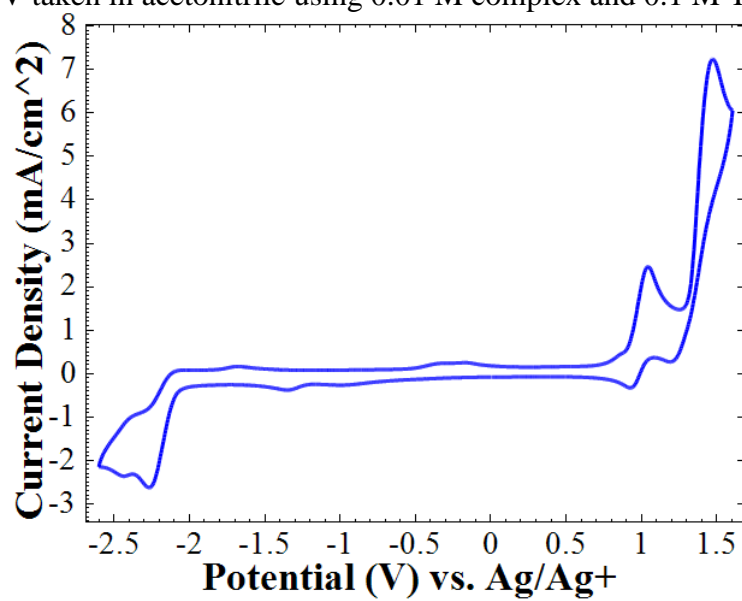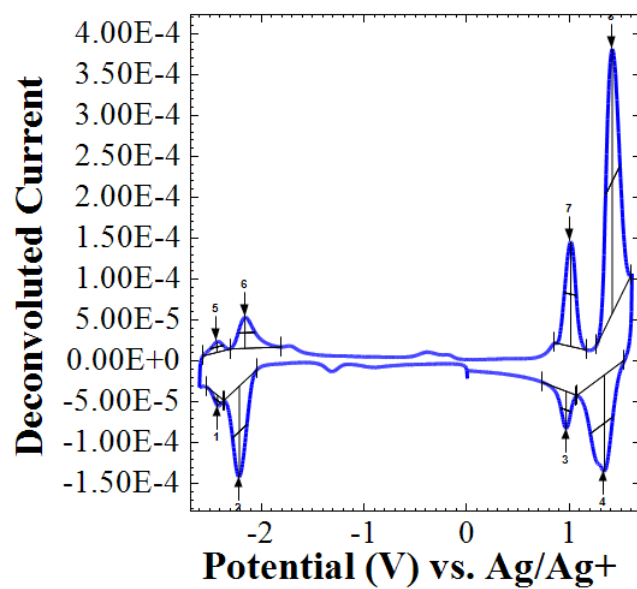

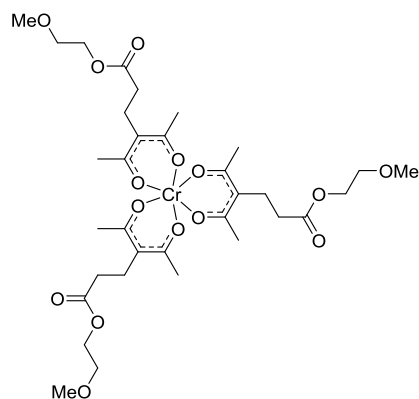

CV taken in acetonitrile using 0.01 M complex and 0.1 M TBABF<sub>4</sub>.

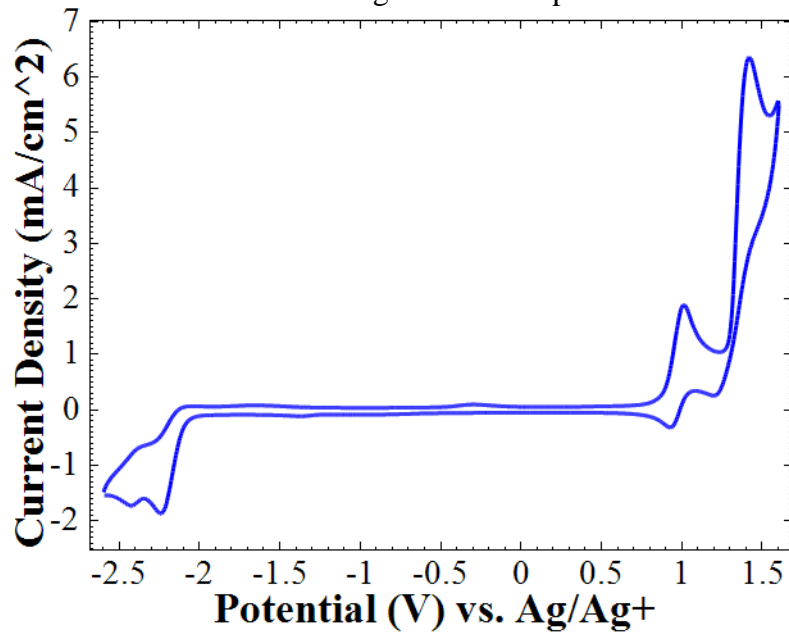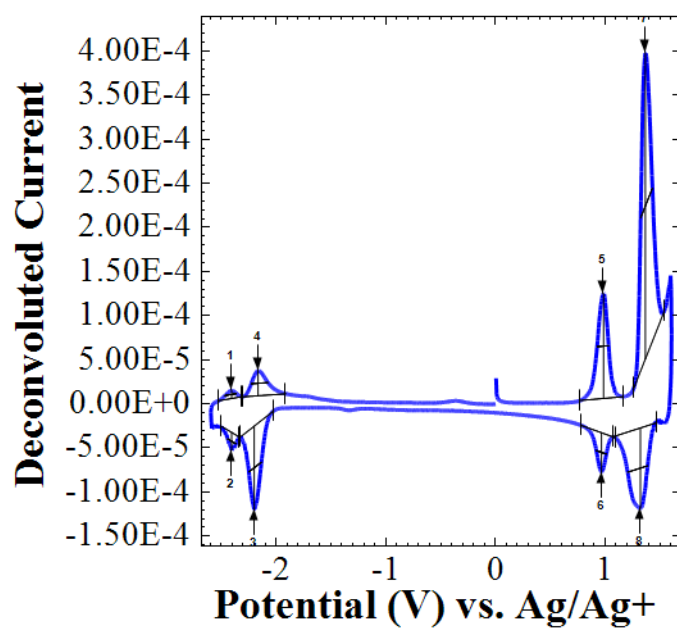

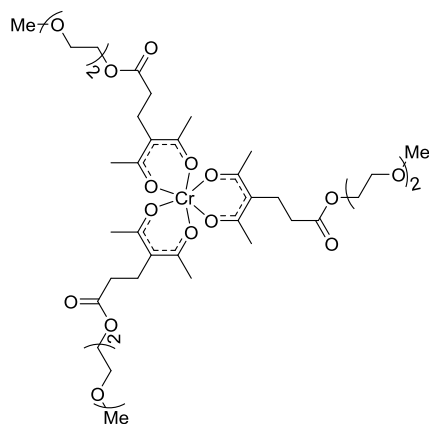

CV taken in acetonitrile using 0.01 M complex and 0.1 M TBABF<sub>4</sub>.

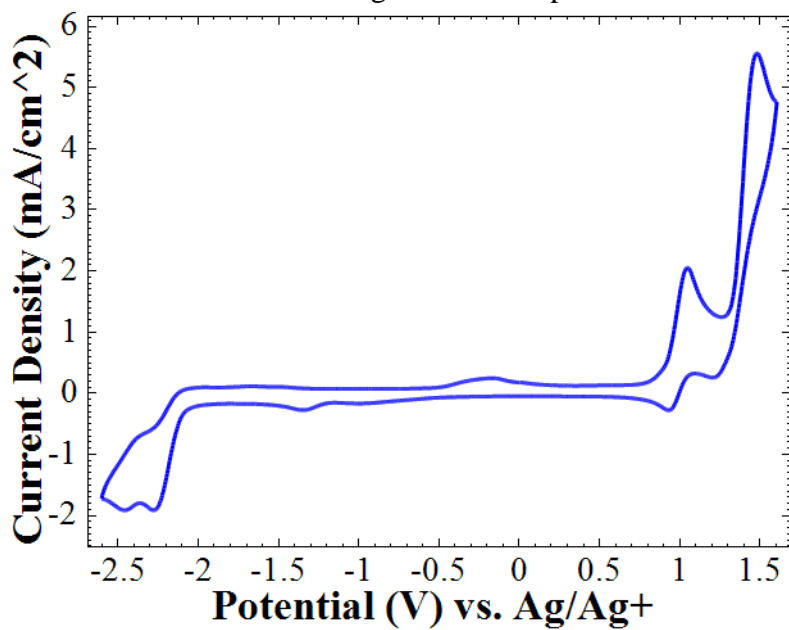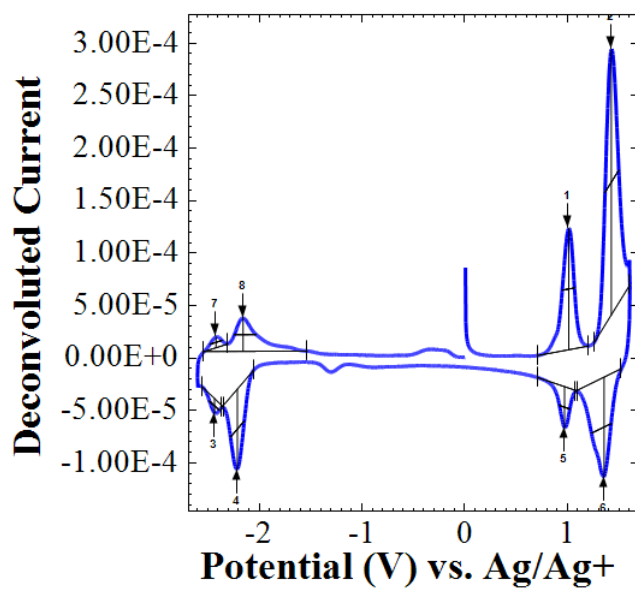

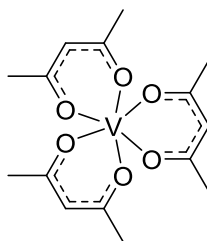

CV taken in acetonitrile using 0.01 M complex and 0.1 M TBABF<sub>4</sub>.

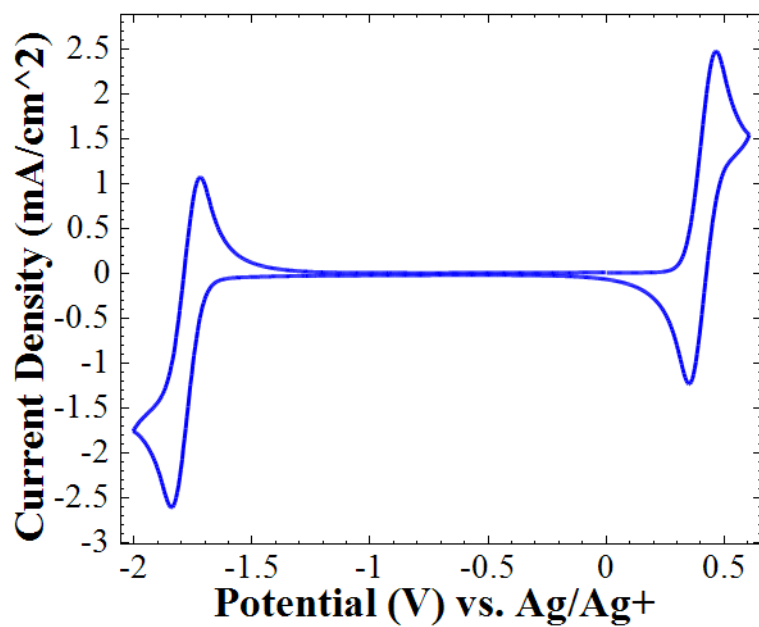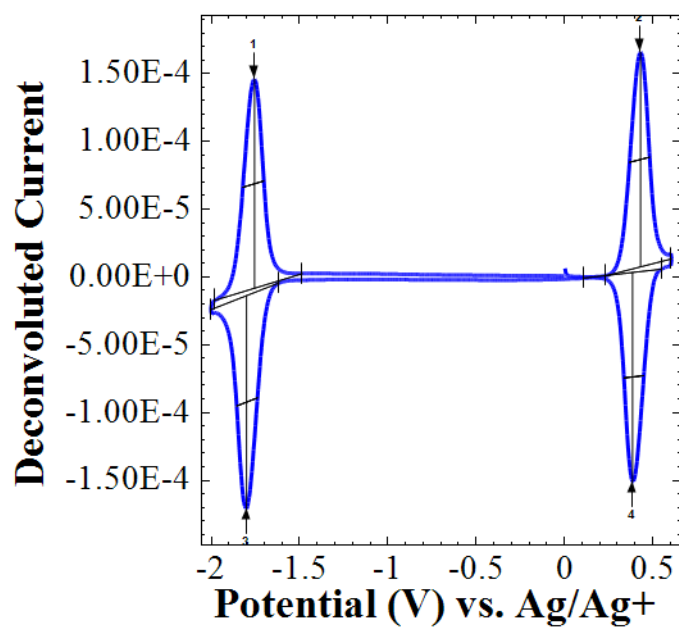



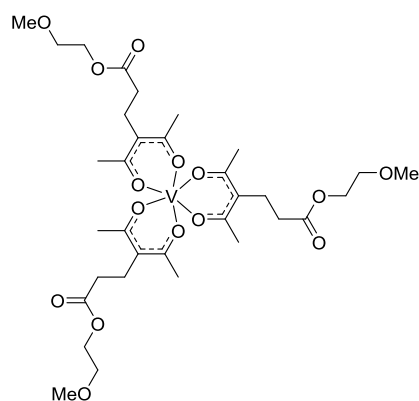

CV taken in acetonitrile using 0.01 M complex and 0.1 M TBABF<sub>4</sub>.

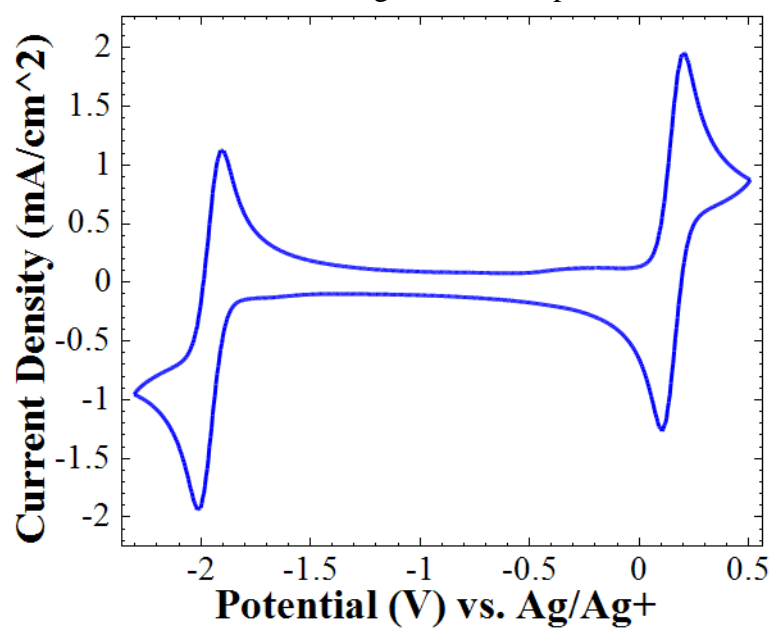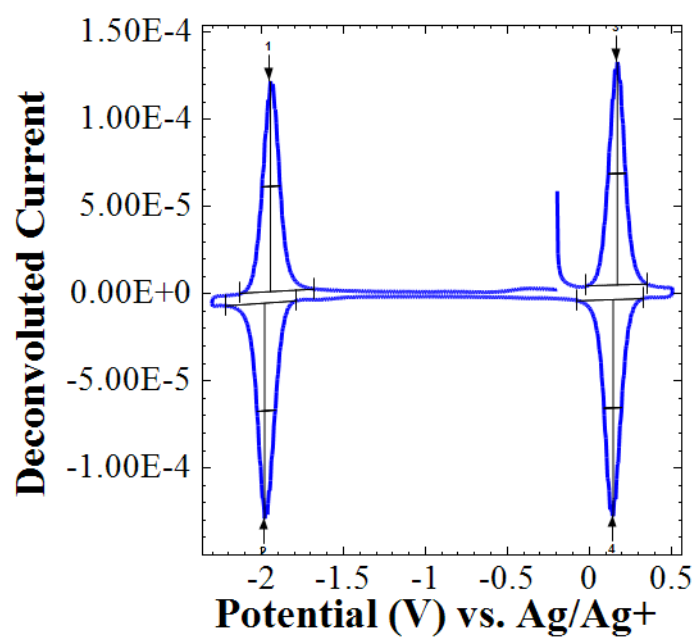

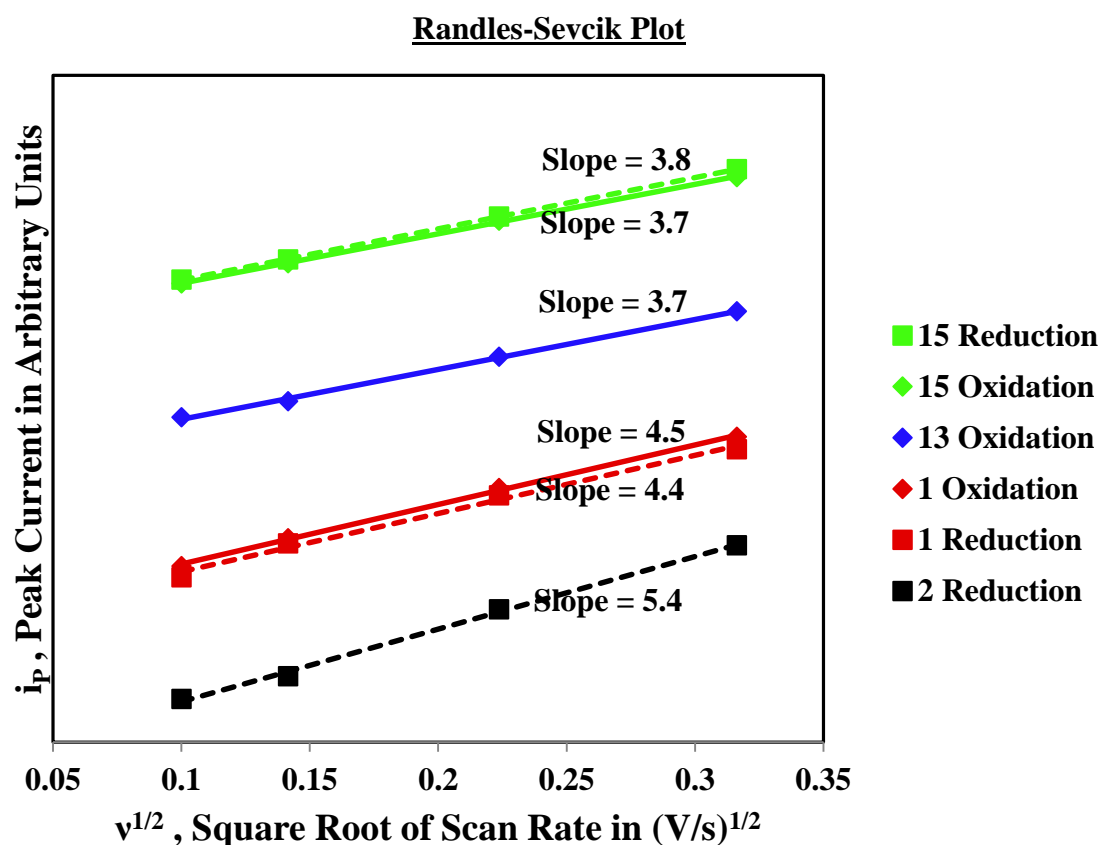

**Figure S4:** Plot of peak current (adjusted to increase separation) versus square root of the scan rate. Diamonds are for oxidation reactions, and squares are for reduction reactions. Linear fitting lines are solid for oxidation reactions and dashed for reduction reactions. Reduction peak currents are not available for **13** and oxidation peak currents are not available for **2**, due to irreversible reactions.

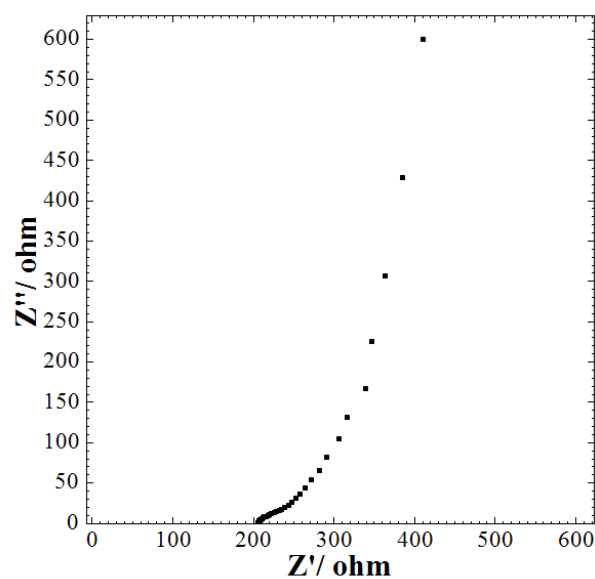

**Figure S5:** EIS Nyquist plot of H-cell with 0.5M TBABF<sub>4</sub> from 0.01-1x10<sup>6</sup> Hz at open circuit potential.  $R_s = 206\Omega$ .

### **References**

1. P. R. Singh and R. Sahai, *Aust. J. Chem.* 1969, **22**, 1169-1175.
2. D. W. Barnum, *J. Inorg. Nucl. Chem.* 1961, **21**, 221-237.
3. K. B. Takvorian and R. H. Barker, *Inorganic Syntheses* 1970, **12**, 85-88.
